# Supplementary material
Source: PubMed Central journal article supplement (PMC4919428)
Supplement: 10.1074_M116.727735_jbc.M116.727735-1.pdf [file 10.1074_M116.727735_jbc.M116.727735-1.pdf]

**Supplement to:**

**Quantitative analysis of dynamic protein interactions during transcription reveals a role for casein kinase II in PAF complex phosphorylation and regulation of H2B monoubiquitylation**

Lynn Glowczewski Bedard<sup>1,2</sup>, Raghuvar Dronamraju<sup>3</sup>, Jenny L. Kerschner<sup>3,4</sup>, Gerald O. Hunter<sup>2</sup>, Elizabeth Devlieger<sup>2</sup>, Asha K. Boyd<sup>1,2</sup>, Brian D. Strahl<sup>3,4,5</sup>, and Amber L. Mosley<sup>‡,2,6</sup>

1. DePauw University, Department of Biology, Greencastle, IN 46135.
2. Indiana University School of Medicine, Department of Biochemistry and Molecular Biology, Indianapolis, IN 46202.
3. Department of Biochemistry and Biophysics, University of North Carolina at Chapel Hill School of Medicine, Chapel Hill, NC 27599, USA
4. UNC Lineberger Comprehensive Cancer Center, University of North Carolina at Chapel Hill School of Medicine, Chapel Hill, NC 27599, USA
5. Curriculum in Genetics and Molecular Biology, The University of North Carolina at Chapel Hill, Chapel Hill, NC 27599, USA
6. Center for Computational Biology and Bioinformatics, Indiana University School of Medicine, Indianapolis, IN 46202

**‡Correspondence should be addressed to: [almosley@iu.edu](mailto:almosley@iu.edu)**

## SUPPLEMENTAL TABLE LEGENDS

Table S1: Yeast strains used in this study.

Table S2: Primers and plasmids used in this study.

Table S3: SAINT analysis of Spt16-TAP interactions (n=4). Known interactions were annotated as such based on the iRef index ([irefindex.org](http://irefindex.org)). Prey names are the standard gene names as defined in the Saccharomyces genome database ([www.yeastgenome.org](http://www.yeastgenome.org)).

Table S4: Phosphorylated peptides identified by PTM analysis of Cdc73-TAP. Both the preceding and following amino acids for each tryptic peptide are shown. The phosphorylation sites are indicated by 'PO4'. Note that some sites were detected with multiple unique peptides.

Table S5: Peptide ratios for Ctr9-FLAG SILAC experiments from WT and CKII temperature sensitive strains. The peptides sequence identified, the sequence match to a putative CKII phosphorylation site, and the SILAC ratio of WT (heavy) and *cka1Δ cka2-8* (light) peptides are given.

**SUPPLEMENTAL TABLES**

Table S1:

| <b>Strain Name</b> | <b>Genotype</b>                                                                        | <b>Reference</b>                     |
|--------------------|----------------------------------------------------------------------------------------|--------------------------------------|
| <b>BY4717</b>      | <i>MATa his3D leu2D met15D ura3D</i>                                                   | Ghaemmaghami, S <i>et al.</i> (2003) |
| <b>Spt16-TAP</b>   | <i>MATa his3D leu2D met15D ura3D Spt16-TAP:HIS3MX6</i>                                 | Ghaemmaghami, S <i>et al.</i> (2003) |
| <b>Ckb2-TAP</b>    | <i>MATa his3D leu2D met15D ura3D Ckb2-TAP:HIS3MX6</i>                                  | Ghaemmaghami, S <i>et al.</i> (2003) |
| <b>Cdc73-TAP</b>   | <i>MATa his3D leu2D met15D ura3D Cdc73-TAP:HIS3MX6</i>                                 | Ghaemmaghami, S <i>et al.</i> (2003) |
| <b>DY150</b>       | <i>MATa ade2 can1 his3 leu2 trp1 ura3</i>                                              | Biswas, D <i>et al.</i> (2006)       |
| <b>DY8107</b>      | <i>MATa spt16-11 ade2 can1 his3 leu2 lys2 met15 trp1 ura3</i>                          | Biswas, D <i>et al.</i> (2007)       |
| <b>DDY4010</b>     | <i>MATa his3 Δ200 leu2-3,112 ura3-52</i>                                               | Peng, Y <i>et al.</i> (2011)         |
| <b>DDY4011</b>     | <i>MATa his3 Δ200 leu2-3,112 ura3-52 cka1::CgURA3</i>                                  | Peng, Y <i>et al.</i> (2011)         |
| <b>DDY4013</b>     | <i>MATa his3 Δ200 leu2-3,112 ura3-52 cka1::CgURA3 cka2-8::NatR</i>                     | Peng, Y <i>et al.</i> (2011)         |
| <b>YJJ662</b>      | <i>MATa ura3-52 leu2Δ1 his3Δ200</i>                                                    | Shi X, <i>et al.</i> (1997)          |
| <b>YJJ577</b>      | <i>MATa ura3-52 leu2Δ1 his3Δ200 paf1Δ::HIS3</i>                                        | Porter, S <i>et al.</i> (2002)       |
| <b>yJK002*</b>     | <i>MATa his3 Δ200 leu2-3,112 ura3-52 CTR9-3xFLAG::kanMX</i>                            | This study                           |
| <b>yJK004†</b>     | <i>MATa his3 Δ200 leu2-3,112 ura3-52 cka1Δ::CgURA3 cka2-8::NatR CTR9-3xFLAG::kanMX</i> | This study                           |
| <b>yJK006‡</b>     | <i>MATa ura3-52 leu2Δ1 his3Δ200 paf1::natNT2</i>                                       | This study                           |
| <b>yJK008‡</b>     | <i>MATa ura3-52 leu2Δ1 his3Δ200 ctr9::natNT2</i>                                       | This study                           |

\* isogenic to DDY4010 (Peng Y, *et al.* 2011 (1))

† isogenic to DDY4013 (Peng Y, *et al.* 2011)

‡ isogenic to YJJ662 (Shi X, *et al.* 1997 (2))

Table S2:

| <b>Table S2. Plasmids and primers used in this study.</b> |                 |                                    |
|-----------------------------------------------------------|-----------------|------------------------------------|
| <b>Plasmids</b>                                           | <b>Features</b> | <b>Source</b>                      |
| pRS316                                                    | CEN URA3        | Sikorski R.S. and Hieter P. (1989) |

|                 |                                                                                |                                    |
|-----------------|--------------------------------------------------------------------------------|------------------------------------|
| pRS313-3HA-SSN6 | <i>CEN HIS3 p3xHA-SSN6</i>                                                     | Michael Keogh                      |
| pJK001          | <i>CEN HIS3 pPAF1(WT)-3XHA-SSN6</i>                                            | This study                         |
| pJK002          | CEN HIS3 pPAF1(S147A, T385A, T422A, S426A)-3XHA-SSN6                           | This study                         |
| pJK003          | CEN HIS3 pPAF1(S147E, T385E, T422E, S426E)-3XHA-SSN6                           | This study                         |
| pJK007          | <i>CEN HIS3 pCTR9(WT)-3XHA-SSN6</i>                                            | This study                         |
| pJK008          | CEN HIS3 pCTR9(S974A, S977A, S1015A, S1017A, S1046A, S1054A, S1056A)-3XHA-SSN6 | This study                         |
| pJK009          | CEN HIS3 pCTR9(S974E, S977E, S1015E, S1017E, S1046E, S1054E, S1056E)-3XHA-SSN6 | This study                         |
| pFA6a – natNT2  | cassette plasmid (deletion)                                                    | Janke C., <i>et al.</i> (2014)     |
| p3FLAG-kanMX    | cassette plasmid (3x-FLAG tagging)                                             | Gelbart M.E., <i>et al.</i> (2001) |
| <b>Primers</b>  | <b>Sequence (5'-3')</b>                                                        | <b>Application</b>                 |
| oGGW05<br>4     | GAAATGTATTCAGTACAATAGAACAGTGCTCATAATAGTATA<br>AAGGGTCACAATGCGTACGCTGCAGGTCGAC  | PafI deletion<br>cassette          |
| oGGW05<br>5     | GTAAAAAGAACTACAGGTTTAAAATCAATCTCCCTTCACTTCT<br>CAATATTCTAATCGATGAATTCGAGCTCG   | PafI deletion<br>cassette          |
| oGGW05<br>6     | CAAAGTTCTAATTGTCTGGTCCATTTGTGTTGAGAGCAAGAA<br>AAAAAACATGCGTACGCTGCAGGTCGAC     | Ctr9 deletion<br>cassette          |
| oGGW05<br>7     | GTATAATATTAAGTTTCTTTAAAAGTCTTGATTCTAACCTCG<br>CCTCTTCTTAATCGATGAATTCGAGCTCG    | Ctr9 deletion<br>cassette          |
| oJLK087         | CGACGAAAACAATGATAATGATGATAACGACGGATTGTTTCAG<br>GGAACAAAAGCTGGAG                | Ctr9-3xFLAG<br>cassette            |
| oJLK088         | TTTCTTTAAAAGTCTTGATTCTAACCTCGCCTTCTTACTAT<br>AGGGCGAATTGGGT                    | Ctr9-3xFLAG<br>cassette            |
| oJLK025         | AAAGGATCCGCCTGCCCAACAGATAAAA                                                   | PafI cloning                       |
| oJLK026         | AAACCCGGGTCTTCTTGTAAGTTTCTTTTCTTCC                                             | PafI cloning                       |
| oJLK055         | AAAGGATCCCTCCACTGCAAACGTTTTCA                                                  | Ctr9 cloning                       |
| oJLK056         | AAAGATATCGAACAATCCGTCGTTATCATCA                                                | Ctr9 cloning                       |
| oJLK018         | GCGCTTGATGATGGAGATGCGGATGATGAAAACC                                             | PafI S147A<br>mutagenesis          |
| oJLK019         | AGAAAGAATCGGAAGGCGATTCAAAGCAGAAGGTTCTGAG                                       | PafI T385A<br>mutagenesis          |
| oJLK020         | GATGAAAACCGTGCAGCTGATGCGCCCGAACTTC                                             | PafI T422A<br>mutagenesis          |
| oJLK021         | CTGATGCGCCCGAACTGCAGATGCTGTTACTACT                                             | PafI S426A                         |

|         |                                                                                        |                                       |
|---------|----------------------------------------------------------------------------------------|---------------------------------------|
|         |                                                                                        | mutagenesis                           |
| oJLK034 | AGGCGCTTGGATGATGGAGATGAGGATGATGAAAACCTTGA                                              | Paf1 S147E<br>mutagenesis             |
| oJLK035 | GAAAGAATCGGAAGGCGATTCAAAAGAGGAAGGTTCTGAGC<br>AAGAAGGA                                  | Paf1 T385E<br>mutagenesis             |
| oJLK036 | CAAGATGAAAACCGTGCAGCTGATGAGCCCGAAACTGAGGA<br>TGCTGTTCATACTGAACAAAAA                    | Paf1 T422E,<br>S426E<br>mutagenesis   |
| oJLK061 | CCATAAGTGAACATAATGTTAAAGATGATGCAGATCTGGCTG<br>ATAAAGACAATGAATATGAC                     | Ctr9 S974A,<br>S977A<br>mutagenesis   |
| oJLK062 | GAAAGCTGCTAAAAAACTCTTGCCGACGCCGACGAGGATGA<br>CGAT                                      | Ctr9 S1015A,<br>S1017A<br>mutagenesis |
| oJLK063 | ATCTCAACTATCGAATGAATTTATTGAAGATGCTGATGAGGA<br>AGAAGCTCAAA                              | Ctr9 S1046A<br>mutagenesis            |
| oJLK064 | GATGAGGAAGAAGCTCAAATGGCCGGTGCAGAACAAAATAA<br>AAACGATG                                  | Ctr9 S1054A,<br>S1056A<br>mutagenesis |
| oJLK072 | CCATGGCCATAAGTGAACATAATGTTAAAGATGATGAGGATC<br>TGGAGGATAAAGACAATGAATATGACGAAGAAAAGCCAAG | Ctr9 S974E,<br>S977E<br>mutagenesis   |
| oJLK073 | CGGTGAATCTAAGAGAAGGAAAGCTGCTAAAAAACTCTTGA<br>GGACGAGGACGAGGATGACGATGATGTG              | Ctr9 S1015E,<br>S1017E<br>mutagenesis |
| oJLK074 | ATCTCAACTATCGAATGAATTTATTGAAGATGAGGATGAGGA<br>AGAAGCTCAAATGGAG                         | Ctr9 S1046E<br>mutagenesis            |
| oJLK076 | AAGATAGTGATGAGGAAGAAGCTCAAATGGAGGGTGAGGAA<br>CAAAATAAAAACGATGACAACGACG                 | Ctr9 S1054E,<br>S1056E<br>mutagenesis |

Table S3:

| BAIT  | PREY  | FC_A (average<br>mean of<br>replicates) | FC_B<br>(geometric<br>mean of<br>replicates) | SAINT<br>probability<br>Score | Known<br>interaction<br>(iREF) |
|-------|-------|-----------------------------------------|----------------------------------------------|-------------------------------|--------------------------------|
| SPT16 | POB3  | 3475.31                                 | 3257.34                                      | 1                             | Yes                            |
| SPT16 | SPT16 | 1295.52                                 | 998.31                                       | 1                             | Yes                            |
| SPT16 | HIS1  | 409.69                                  | 358.56                                       | 1                             | No                             |
| SPT16 | CKA2  | 175.66                                  | 110.49                                       | 1                             | Yes                            |
| SPT16 | LEO1  | 96.61                                   | 90.75                                        | 1                             | Yes                            |
| SPT16 | CKB2  | 150.5                                   | 82.3                                         | 1                             | Yes                            |
| SPT16 | CKB1  | 125.24                                  | 80.7                                         | 1                             | Yes                            |
| SPT16 | CTR9  | 68.58                                   | 61.82                                        | 1                             | Yes                            |
| SPT16 | HHF1  | 36.39                                   | 31.42                                        | 1                             | Yes                            |
| SPT16 | RPS6A | 35.2                                    | 29.02                                        | 1                             | No                             |

|       |         |        |       |      |     |
|-------|---------|--------|-------|------|-----|
| SPT16 | PSH1    | 28.94  | 25.01 | 1    | Yes |
| SPT16 | PAF1    | 24.5   | 19.73 | 1    | Yes |
| SPT16 | IKI3    | 29     | 16.12 | 1    | No  |
| SPT16 | RPS8A   | 14.99  | 13.37 | 1    | No  |
| SPT16 | RTF1    | 13.56  | 11.5  | 0.98 | Yes |
| SPT16 | CKA1    | 164.19 | 69.92 | 0.93 | Yes |
| SPT16 | MSH6    | 56.6   | 20.17 | 0.75 | No  |
| SPT16 | YFL054C | 36.15  | 16.29 | 0.75 | No  |
| SPT16 | HTB2    | 28.54  | 11.4  | 0.75 | Yes |
| SPT16 | LAP4    | 38.59  | 11.37 | 0.75 | No  |
| SPT16 | MRC1    | 19.34  | 8.72  | 0.75 | No  |
| SPT16 | RRM3    | 13.39  | 8.43  | 0.75 | No  |
| SPT16 | RPS17A  | 14.24  | 8.11  | 0.75 | No  |
| SPT16 | HTA1    | 32.53  | 7.7   | 0.75 | Yes |
| SPT16 | RAV1    | 13.24  | 7.31  | 0.75 | No  |
| SPT16 | YTA6    | 15.62  | 7.27  | 0.75 | No  |
| SPT16 | PTK2    | 12.24  | 7.12  | 0.75 | No  |
| SPT16 | CTI6    | 11.8   | 7.03  | 0.75 | No  |
| SPT16 | SFL1    | 15.68  | 6.93  | 0.75 | No  |
| SPT16 | YOR1    | 13.32  | 6.89  | 0.75 | No  |
| SPT16 | RPS18A  | 10.9   | 6.55  | 0.75 | No  |
| SPT16 | RPL1A   | 8.05   | 6.35  | 0.75 | No  |
| SPT16 | YKL105C | 9.22   | 6.22  | 0.75 | No  |
| SPT16 | CDC73   | 17.92  | 6.1   | 0.75 | Yes |
| SPT16 | SNT1    | 9.09   | 5.88  | 0.75 | No  |
| SPT16 | SKI2    | 8.08   | 5.28  | 0.75 | No  |
| SPT16 | BOI2    | 8.45   | 5.28  | 0.75 | No  |
| SPT16 | ZIP1    | 10.87  | 4.93  | 0.75 | No  |
| SPT16 | PKH2    | 5.45   | 4.17  | 0.75 | No  |

Table S4:

| Protein | Site               | Peptide                                                                        | XCorr | X!Tandem |
|---------|--------------------|--------------------------------------------------------------------------------|-------|----------|
| Cdc73   | S157               | K.STTSASLENDSP <sup>PO4</sup> EVSDPVVVETMK.H                                   | 4.35  | 6.15     |
| Ctr9    | S974, S977         | R.EAMAISEHNVKDDSP <sup>PO4</sup> DLS <sup>PO4</sup> DK.D                       | 5.55  | 3.15     |
|         |                    | K.DDSP <sup>PO4</sup> DLS <sup>PO4</sup> DKDNEYDEEKPR.Q                        | 4.57  | 5.49     |
|         | S977               | K.DDSDLS <sup>PO4</sup> DKDNEYDEEKPR.Q                                         | 4.54  | 4.89     |
|         |                    | K.DDSDLS <sup>PO4</sup> DKDNEYDEEKPR.Q                                         | 4.86  | 2.39     |
|         | S1015              | K.AAKKTLSP <sup>PO4</sup> DSDEDDDDVVK.K                                        | 5.6   | 6.12     |
|         | S1017              | K.AAKKTLSDSP <sup>PO4</sup> DEDDDDVVK.K                                        | 5.14  | 5.77     |
|         | S1015, S1017       | K.AAKKTLSP <sup>PO4</sup> DS <sup>PO4</sup> DEDDDDVVK.K                        | 5.63  | 3.06     |
|         |                    | K.KTLSP <sup>PO4</sup> DS <sup>PO4</sup> DEDDDDVVK.K                           | 6.03  | 5.7      |
|         | S1046, S1054, 1056 | K.SQLSNEFIEDSP <sup>PO4</sup> DEEEAQMS <sup>PO4</sup> GS <sup>PO4</sup> EQNK.N | 8.11  | 3.89     |

|      |              |                                                                  |      |      |
|------|--------------|------------------------------------------------------------------|------|------|
|      | S1046, S1054 | K.SQLSNEFIEDS <sup>PO4</sup> DEEEAQMS<br><sup>PO4</sup> GSEQNK.N | 5.67 | 3.51 |
|      |              | K.SQLSNEFIEDsDEEEAQmsGSEQNK(N)                                   | 7.36 | 5.96 |
|      | S1054        | (K)SQLSNEFIEDSDEEEAQMS<br><sup>PO4</sup> GSEQNK.N                | 6.94 | 5.64 |
| Leo1 | S25          | K.EQISNNVGVTNS <sup>PO4</sup> TSNEETSR.S                         | 5.96 | 7.21 |
|      | T26          | K.EQISNNVGVTNST <sup>PO4</sup> SNEETSR.S                         | 5.65 | 6.96 |
|      | S105         | R.SRHRES <sup>PO4</sup> LGLDDDEAEEQAMYTR.K                       | 6.46 | 2.1  |
|      | S132         | R.KFYGEDANNFS <sup>PO4</sup> DQDETTHTFK.E                        | 7.6  | 4.32 |
|      |              | K.FYGEDANNFS<br><sup>PO4</sup> DQDETTHTFKEENVLVR.H               | 7.04 | 5.26 |
|      |              | R.KFYGEDANNFS <sup>PO4</sup> DQDETTHTFK.E                        | 7.6  | 4.32 |
|      | S358         | K.EKQES <sup>PO4</sup> PDAAFETGFR.K                              | 3.77 | 1.96 |
|      |              | K.QES <sup>PO4</sup> PDAAFETGFR.K                                | 4.39 | 2.49 |
|      | S372         | R.KQNS <sup>PO4</sup> PTTYGASR.R                                 | 3.87 | 1.68 |
| Paf1 | S32          | K.LLVYPES <sup>PO4</sup> PETNADSSQLINSLYIK.T                     | 5.24 | 5.1  |
|      | S147         | K.RRLDDGDS <sup>PO4</sup> DENLDVNHIISR.V                         | 5.83 | 4.17 |
|      | S388 or T385 | K.TEGS <sup>PO4</sup> EQEGENEKDEEIK.Q                            | 5.29 | 2.52 |
|      |              | K.T <sup>PO4</sup> EGSEQEGENEKDEEIKQEK.E                         | 6.04 | 1.66 |
|      | S388, T385   | K.ESEGDSKT <sup>PO4</sup> EGS<br><sup>PO4</sup> EQEGENEKDEEIK.Q  | 4.61 | 3.85 |
|      | T422         | R.AADT <sup>PO4</sup> PETSDAVHTEQKPEEEEEK.E                      | 5.49 | 4.42 |
|      | T422, S426   | R.AADT <sup>PO4</sup> PETS <sup>PO4</sup> DAVHTEQKPEEEEEK.E      | 5.62 | 2.4  |
| Rtf1 | S90          | K.DES <sup>PO4</sup> DREHLESLPEMER.E                             | 4.48 |      |
|      | S181         | R.HYS <sup>PO4</sup> DNEDEDDEEDYR.E                              | 4.77 | 5.24 |
|      |              | R.HYS <sup>PO4</sup> DNEDEDDEEDYREEDYK.D                         | 6.12 | 3.85 |
|      | S203         | K.DDEGS <sup>PO4</sup> EYGDDEEYNPFDR.R                           | 5.5  | 5.05 |

Table S5:

| Protein | Potential CKII site(s)? | Peptide sequence                                                | <i>cka1Δ</i> <i>cka2-8</i> / WT ratio | Modification status       |
|---------|-------------------------|-----------------------------------------------------------------|---------------------------------------|---------------------------|
| Ctr9    | Yes                     | EAMAISEHNVKDDSDLSDKDN<br>EYDEEKPR                               | 8.69                                  | S974 and 977 unmodified   |
| Ctr9    | Yes                     | EAMAISEHNVKDDSDLS <sup>PO4</sup><br><sup>PO4</sup> DKDNEYDEEKPR | 0.39                                  | S974 and 977 PO4          |
| Ctr9    | Yes                     | KTLSDSDEDDDDVVKKPSHNK                                           | 41.31                                 | S1015 and 1017 unmodified |
| Ctr9    | Yes                     | TLSDSDEDDDDVVKKPSHNGK<br>K                                      | 48.78                                 | S1015 and 1017 unmodified |
| Ctr9    | Yes                     | TLSDSDEDDDDVVKKPSHNK                                            | 39.64                                 | S1015 and 1017 unmodified |
| Ctr9    | Yes                     | KTLSDS<br><sup>PO4</sup> DEDDDDVVKKPSHNK                        | 3.20                                  | S1017 PO4                 |
| Ctr9    | Yes                     | TLSDS<br><sup>PO4</sup> DEDDDDVVKKPSHNGK                        | 3.48                                  | S1017 PO4                 |
| Ctr9    | Yes                     | TLSDS<br><sup>PO4</sup> DEDDDDVVKKPSHNK                         | 3.20                                  | S1017 PO4                 |

|      |     |                                                |       |                    |
|------|-----|------------------------------------------------|-------|--------------------|
| Ctr9 | Yes | TLS <sup>PO4</sup> DS <sup>PO4</sup> DEDDDDVVK | 0.13  | S1015 and 1017 PO4 |
| Paf1 | No  | LLVYPESPETNADSSQLINSLYIK                       | 1.14  | S32 unmodified     |
| Paf1 | No  | LLVYPES <sup>PO4</sup> PETNADSSQLINSLYIK       | 0.64  | S32 PO4            |
| Paf1 | No  | RTEYVSNT <sup>PO4</sup> IAAHDNTSLKR            | 3.15  | T127 PO4           |
| Paf1 | No  | TEYVSNTIAAHDNTSLKR                             | 0.79  | T127 unmodified    |
| Paf1 | Yes | RLDDGDSDDENLDVNHIISRVEGTFNK                    | 44.19 | S147 unmodified    |
| Paf1 | Yes | RRLDDGDSDDENLDVNHIISR                          | 29.57 | S147 unmodified    |
| Paf1 | Yes | RLDDGDSDDENLDVNHIISR                           | 29.38 | S147 unmodified    |
| Paf1 | Yes | LDDGDSDDENLDVNHIISR                            | 28.10 | S147 unmodified    |
| Paf1 | Yes | RLDDGDS <sup>PO4</sup> DDENLDVNHIISRVEGTFNK    | 0.25  | S147 PO4           |
| Paf1 | Yes | RRLDDGDS <sup>PO4</sup> DDENLDVNHIISR          | 0.31  | S147 PO4           |
| Paf1 | Yes | LDDGDS <sup>PO4</sup> DDENLDVNHIISR            | 0.24  | S147 PO4           |
| Leol | No  | HRESLGLDDDEAEEQAMYTR                           | 0.82  | S105 unmodified    |
| Leol | No  | HRES <sup>PO4</sup> LGLDDDEAEEQAMYTRK          | 1.42  | S105 PO4           |
| Leol | No  | SRHRES <sup>PO4</sup> LGLDDDEAEEQAMYTR         | 1.35  | S105 PO4           |
| Leol | Yes | KFYGEDANNFSDQDETTHTFKEENVELVR                  | 2.47  | S132 unmodified    |
| Leol | Yes | FYGEDANNFSDQDETTHTFKEENVELVR                   | 2.40  | S132 unmodified    |
| Leol | Yes | KFYGEDANNFS <sup>PO4</sup> DQDETTHTFKEENVELVR  | 0.34  | S132 PO4           |
| Leol | Yes | FYGEDANNFS <sup>PO4</sup> DQDETTHTFKEENVELVR   | 0.37  | S132 PO4           |
| Rtfl | Yes | RIEVGSVEDDDEEDDYNPYSVGNADYGS                   | 6.92  | S71 unmodified     |
| Rtfl | Yes | RIEVGSVEDDDEEDDYNPYSV <sup>PO4</sup> GNADYGS   | 0.33  | S71 PO4            |



## **SUPPLEMENTAL FIGURES**

Figure S1: Representative spectra for the phosphorylation sites in the five subunits of PAF-C: Cdc73 (A), Ctr9 (B-K), Leo1 (L-Q), Paf1 (R-W), and Rtf1 (X-AA). In all spectra, b-ions are labeled in red and y-ions are labeled in blue. Neutral loss and other parent ion fragments are shown in green. The XCorr and X!Tandem scores and ppm values are given for reference.

## REFERENCES

1. Peng, Y. B., Fan, B., Han, X. L., Xu, X. W., Rothschild, M. F., Yerle, M., and Liu, B. (2011) Molecular characterization of the porcine JHDM1A gene associated with average daily gain: evaluation its role in skeletal muscle development and growth. *Molecular biology reports* **38**, 4697-4704
2. Shi, X., Chang, M., Wolf, A. J., Chang, C. H., Frazer-Abel, A. A., Wade, P. A., Burton, Z. F., and Jaehning, J. A. (1997) Cdc73p and Paf1p are found in a novel RNA polymerase II-containing complex distinct from the Srbp-containing holoenzyme. *Molecular and cellular biology* **17**, 1160-1169

A

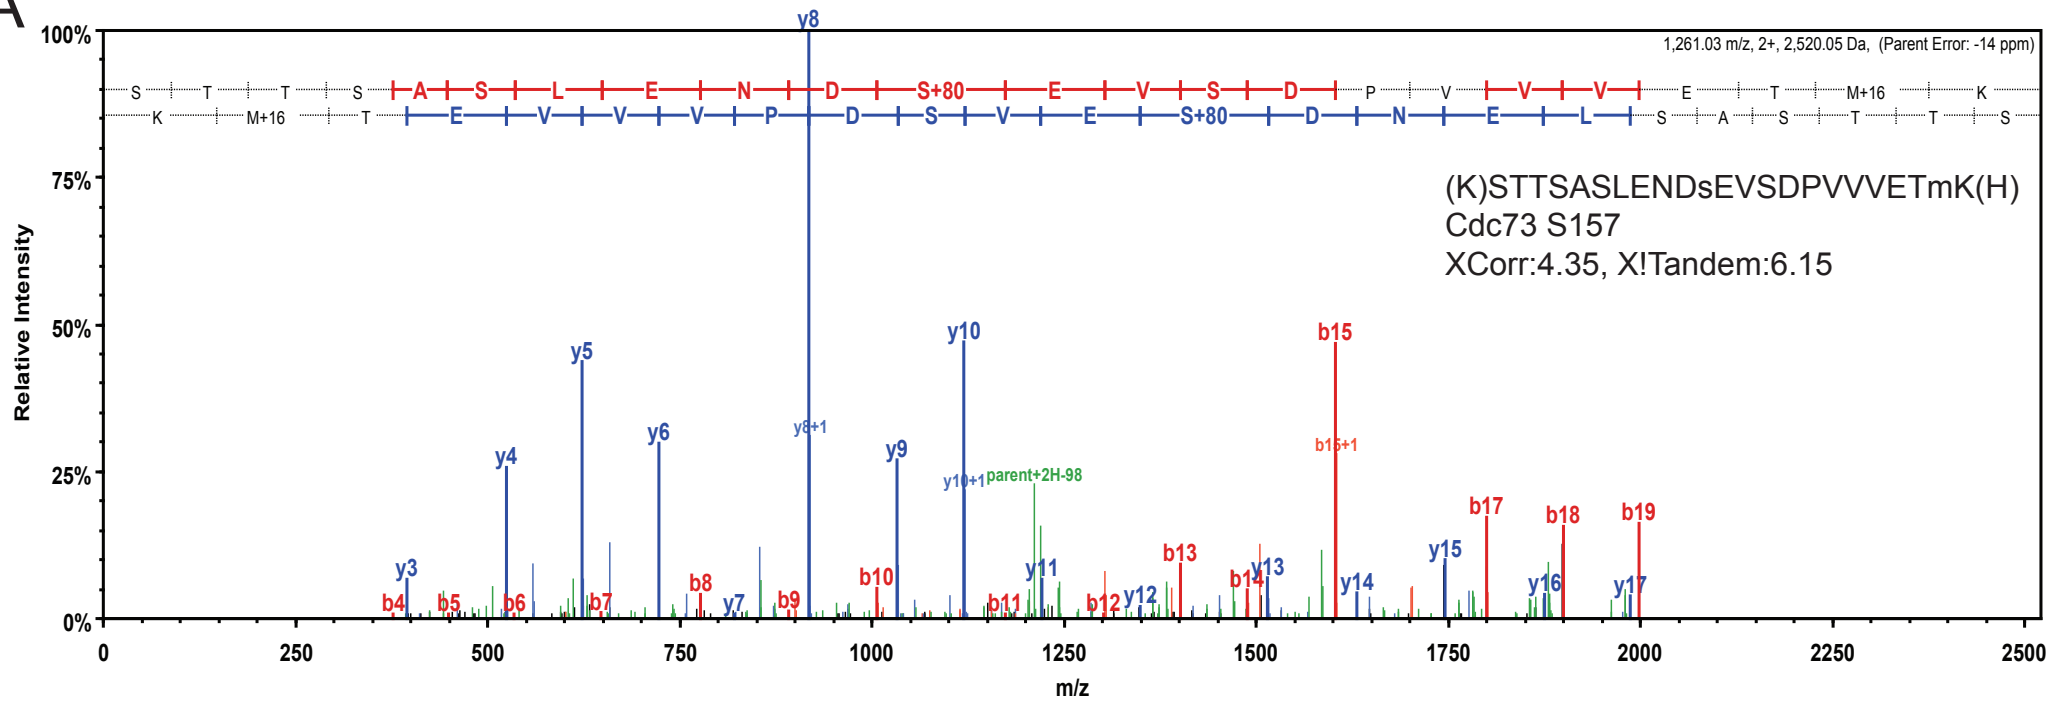

B

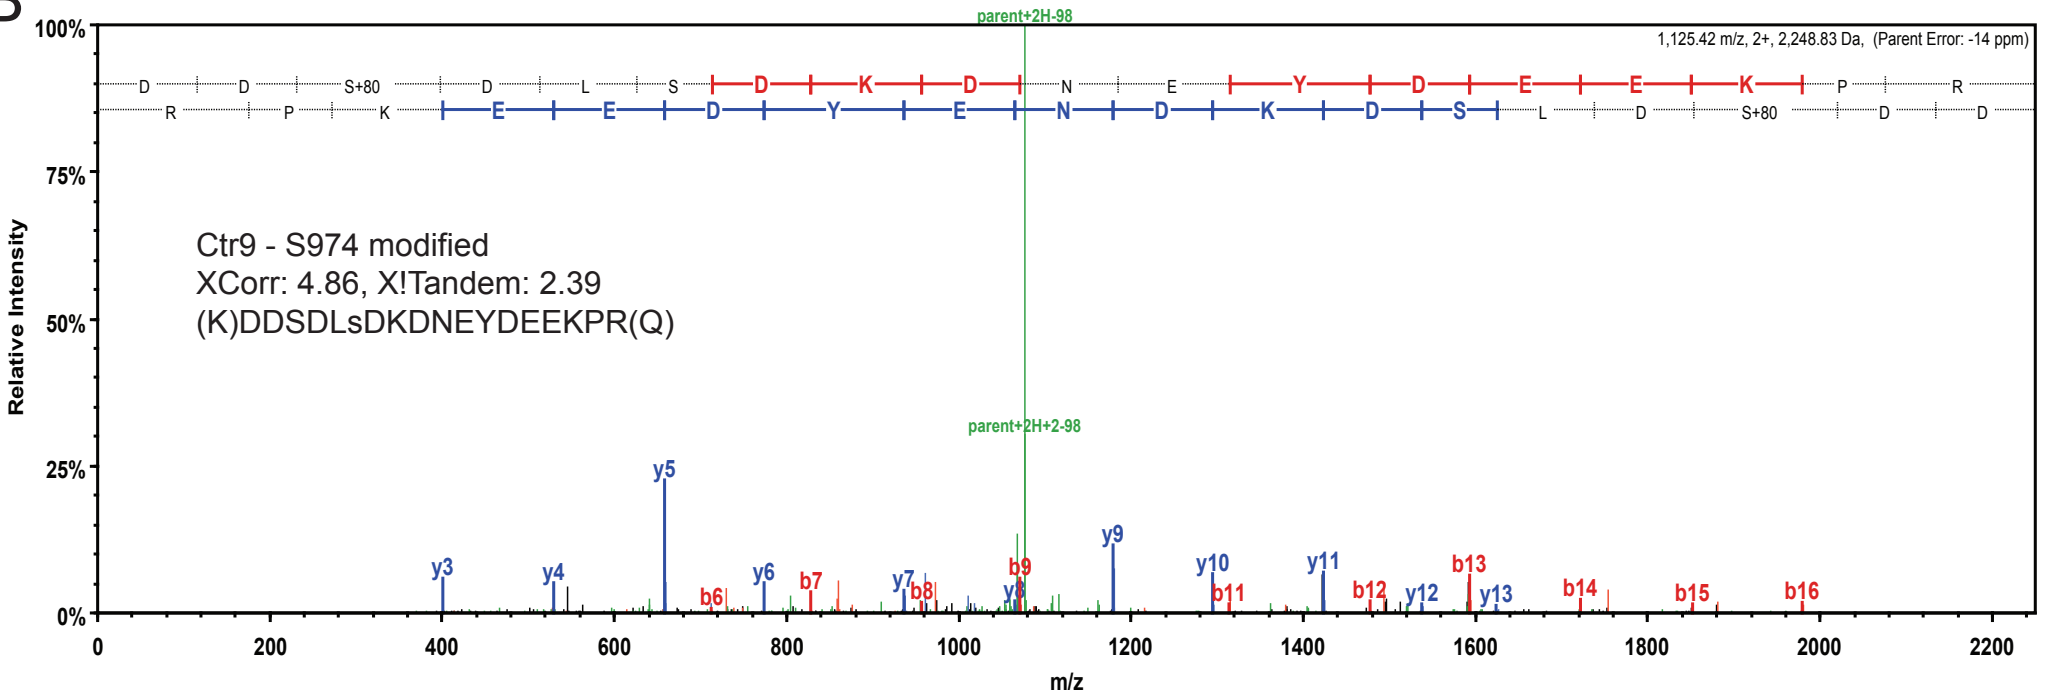

**C**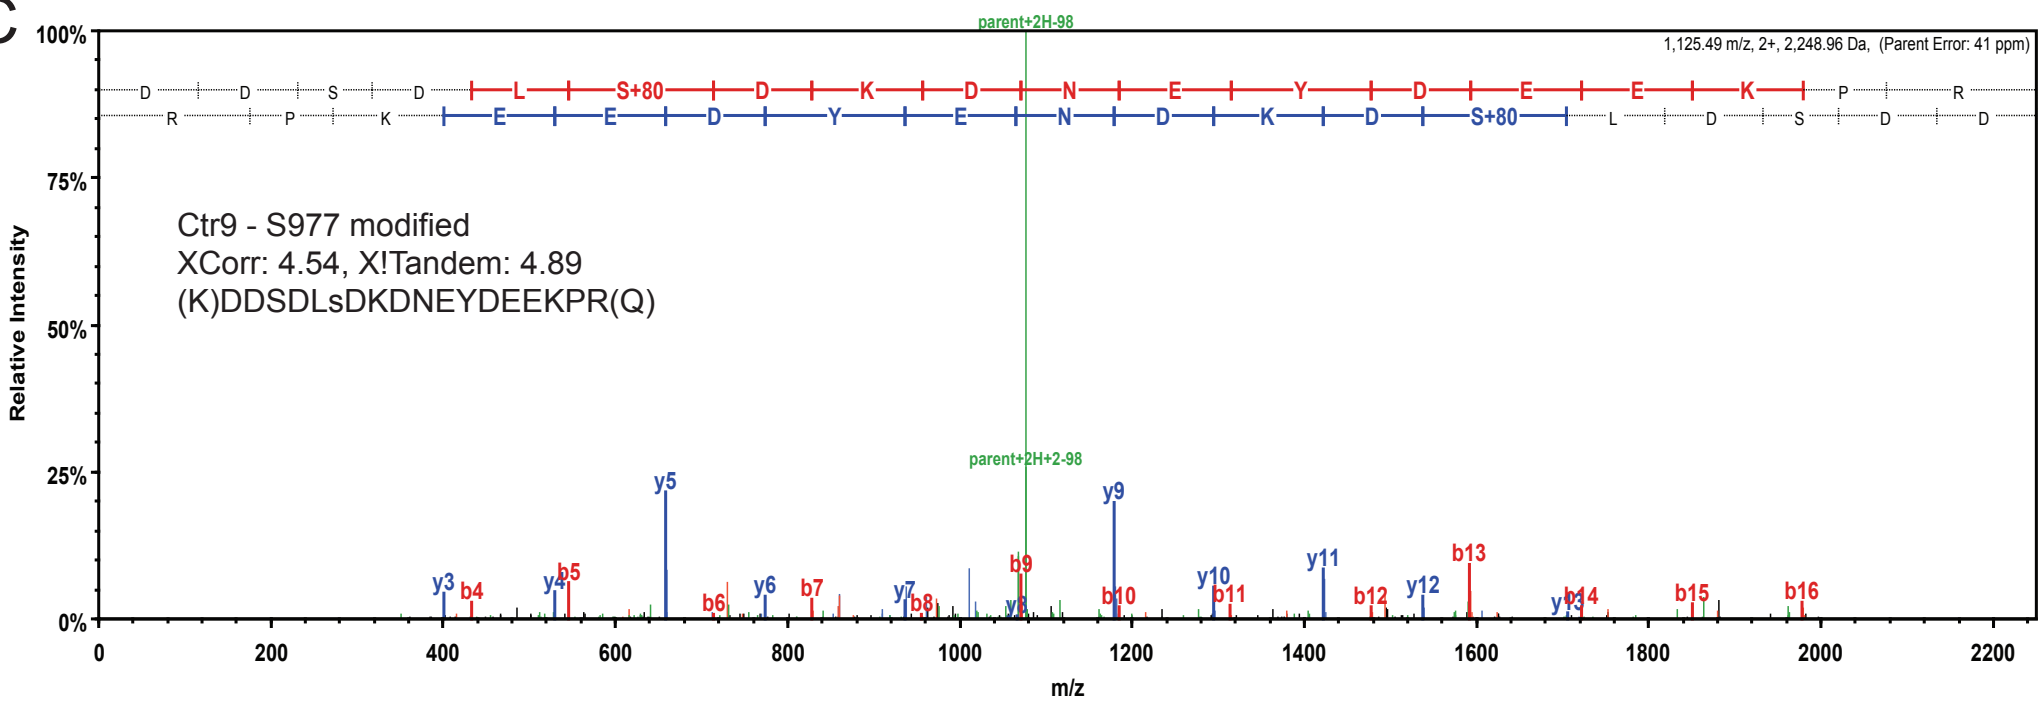**D**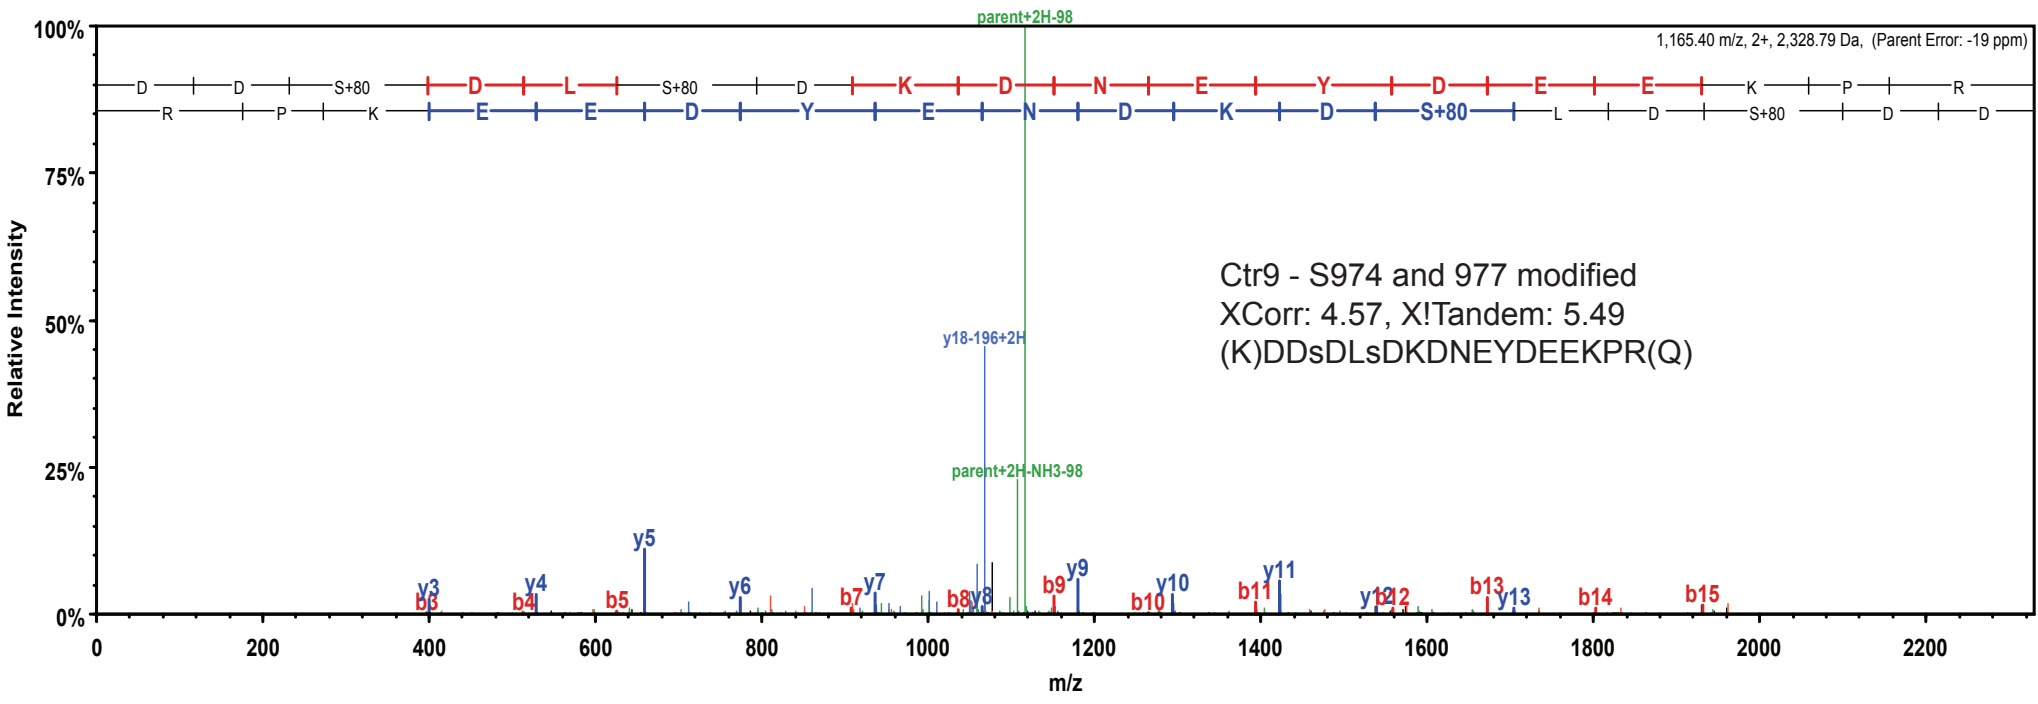

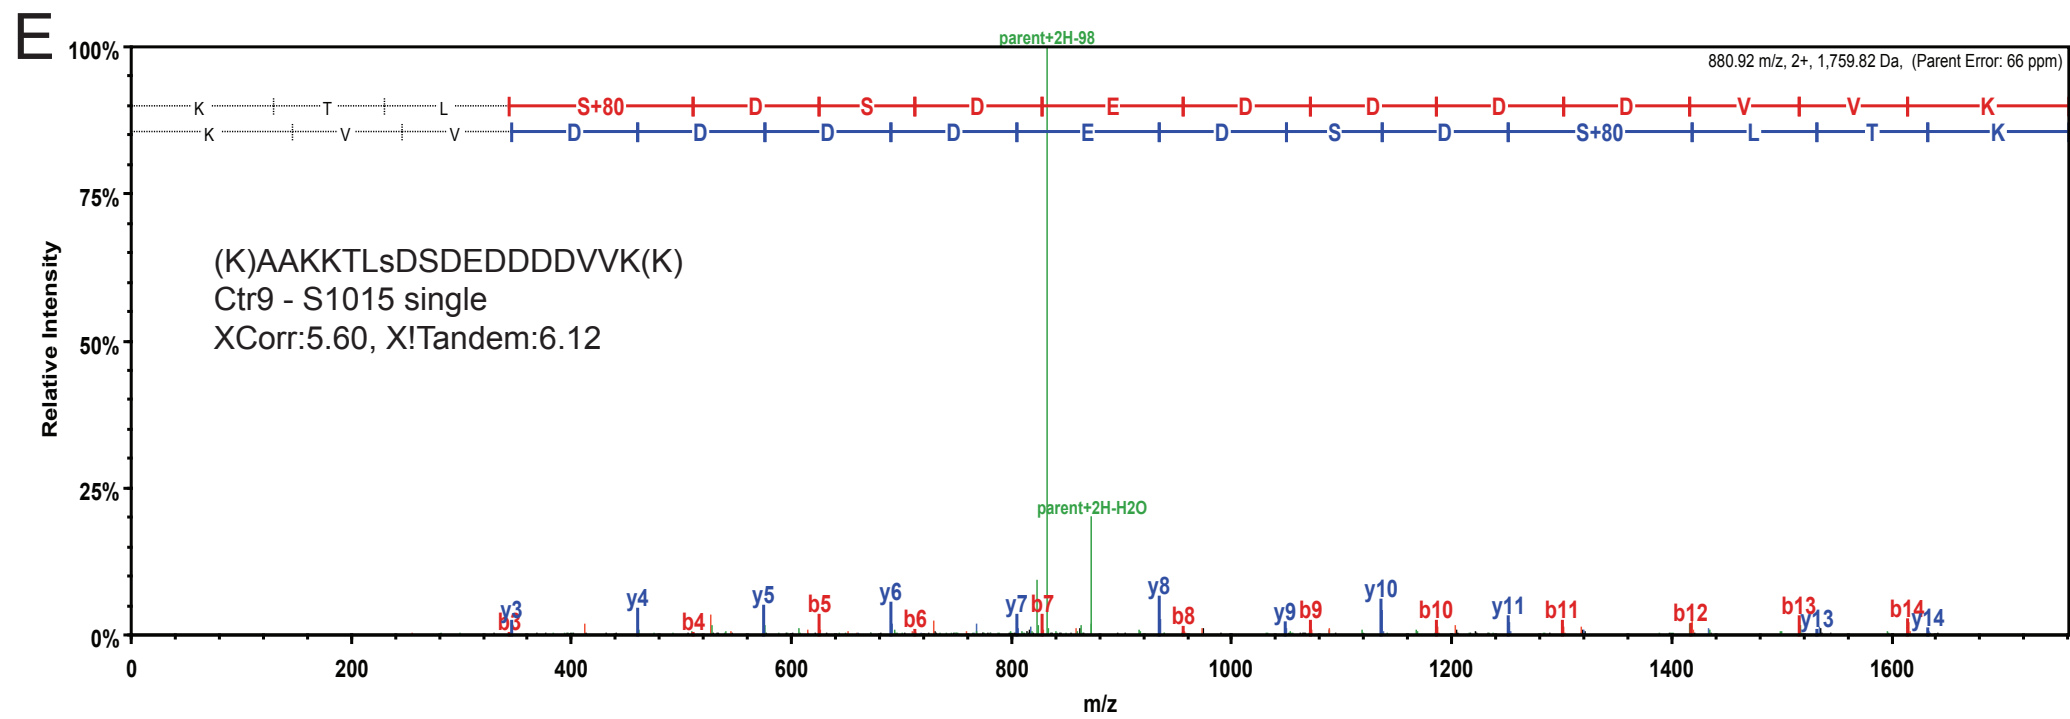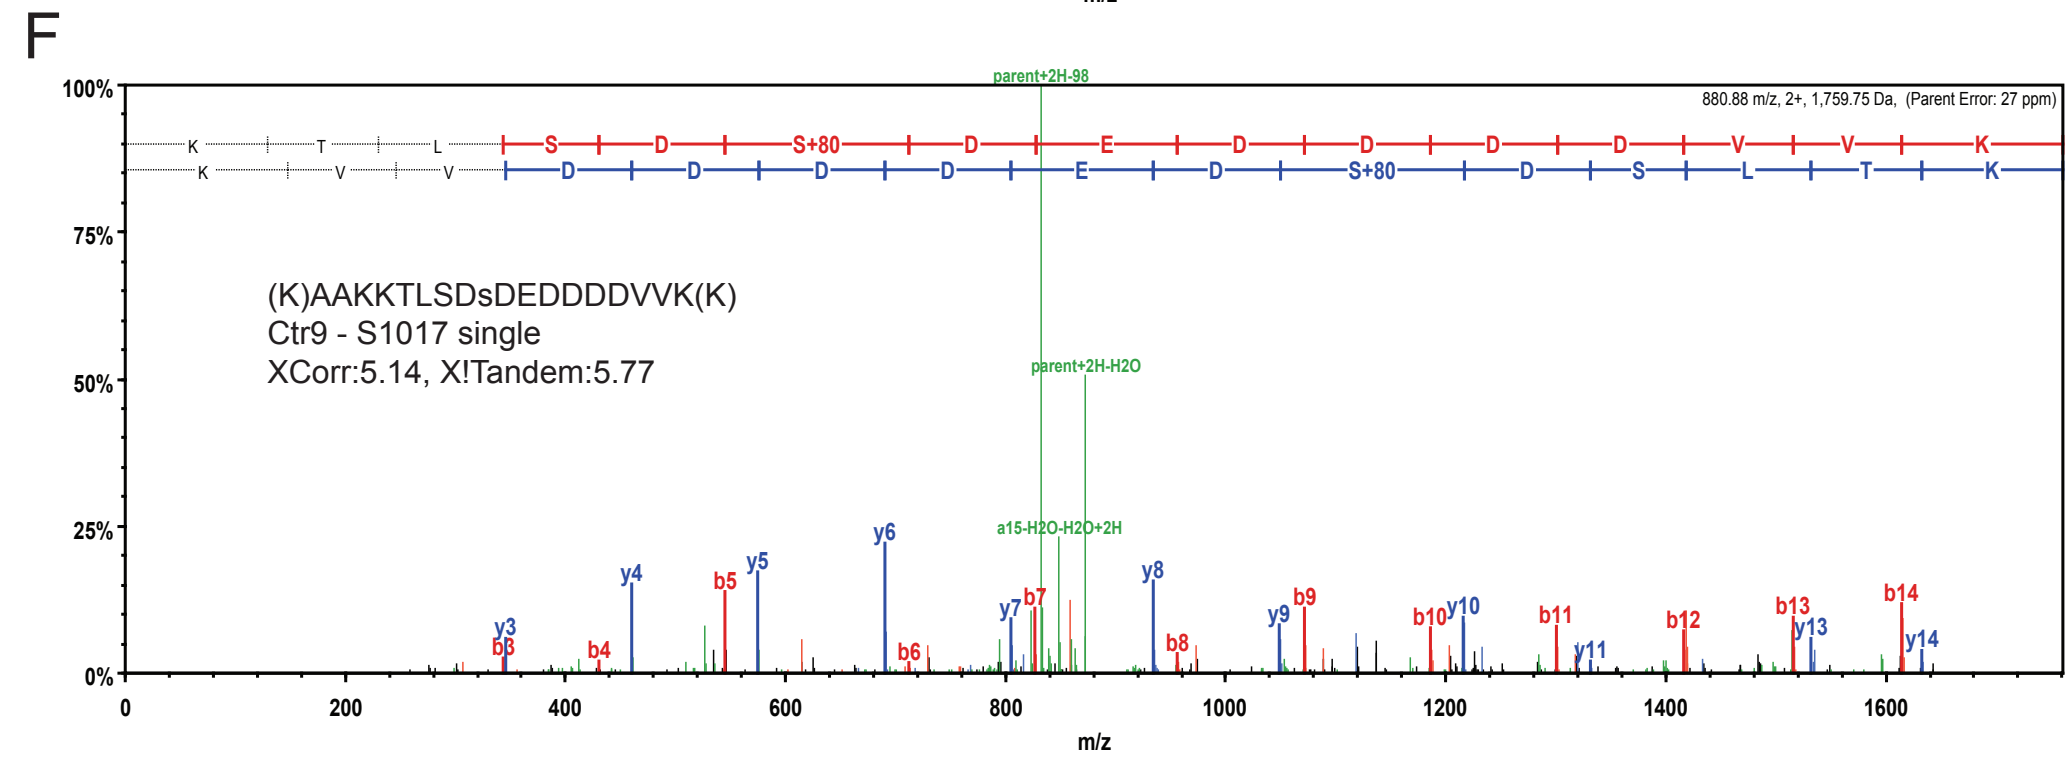

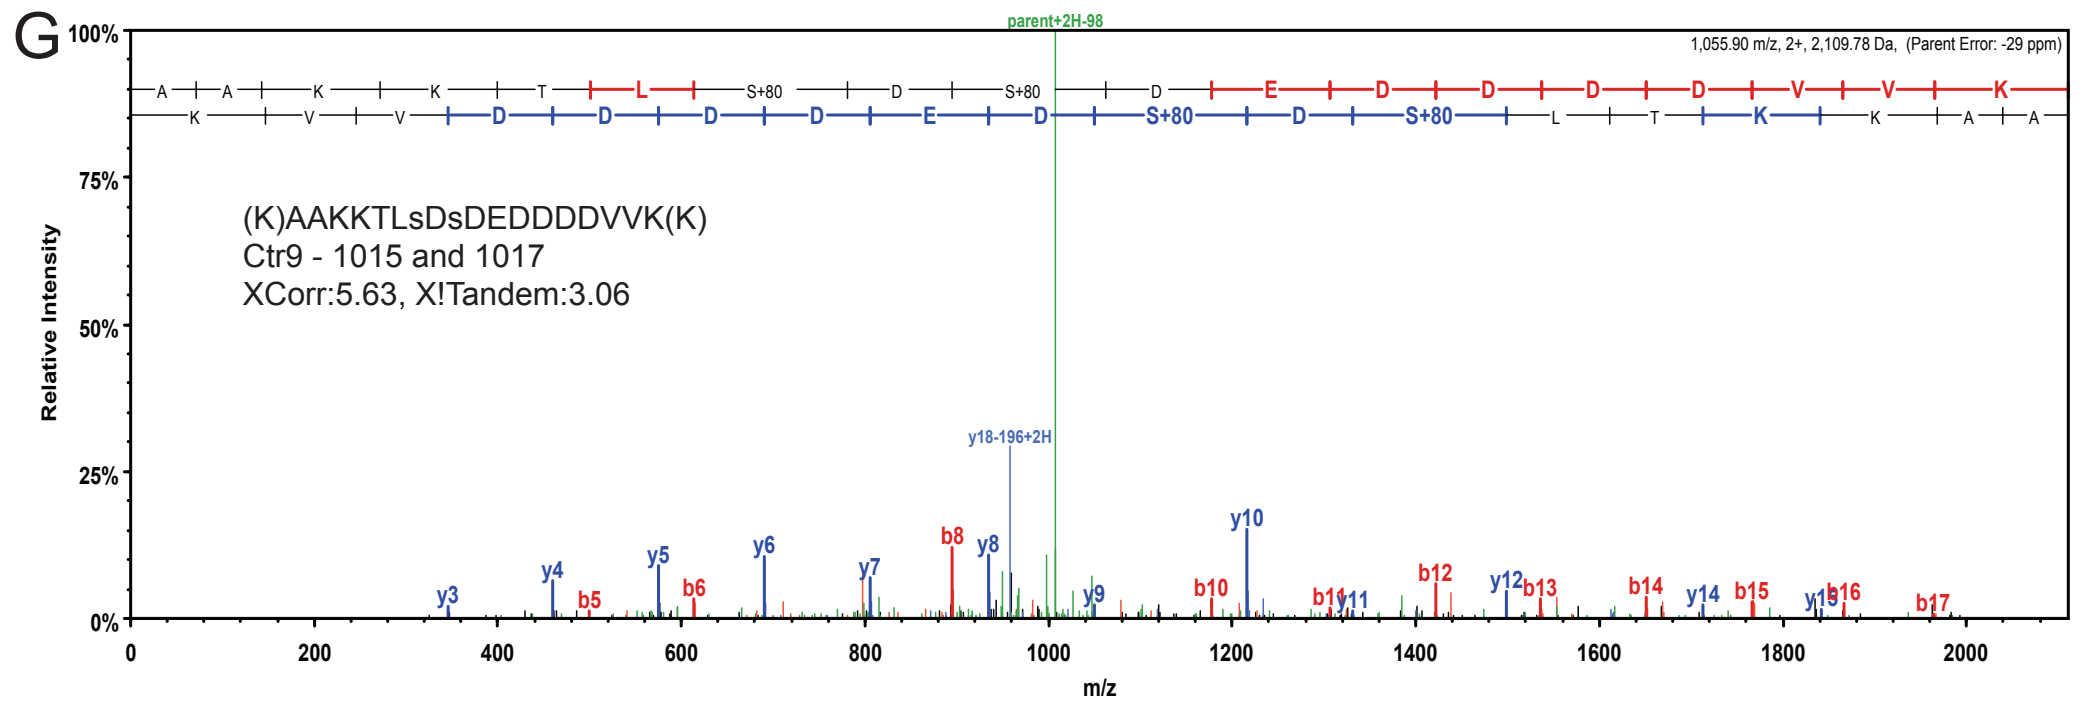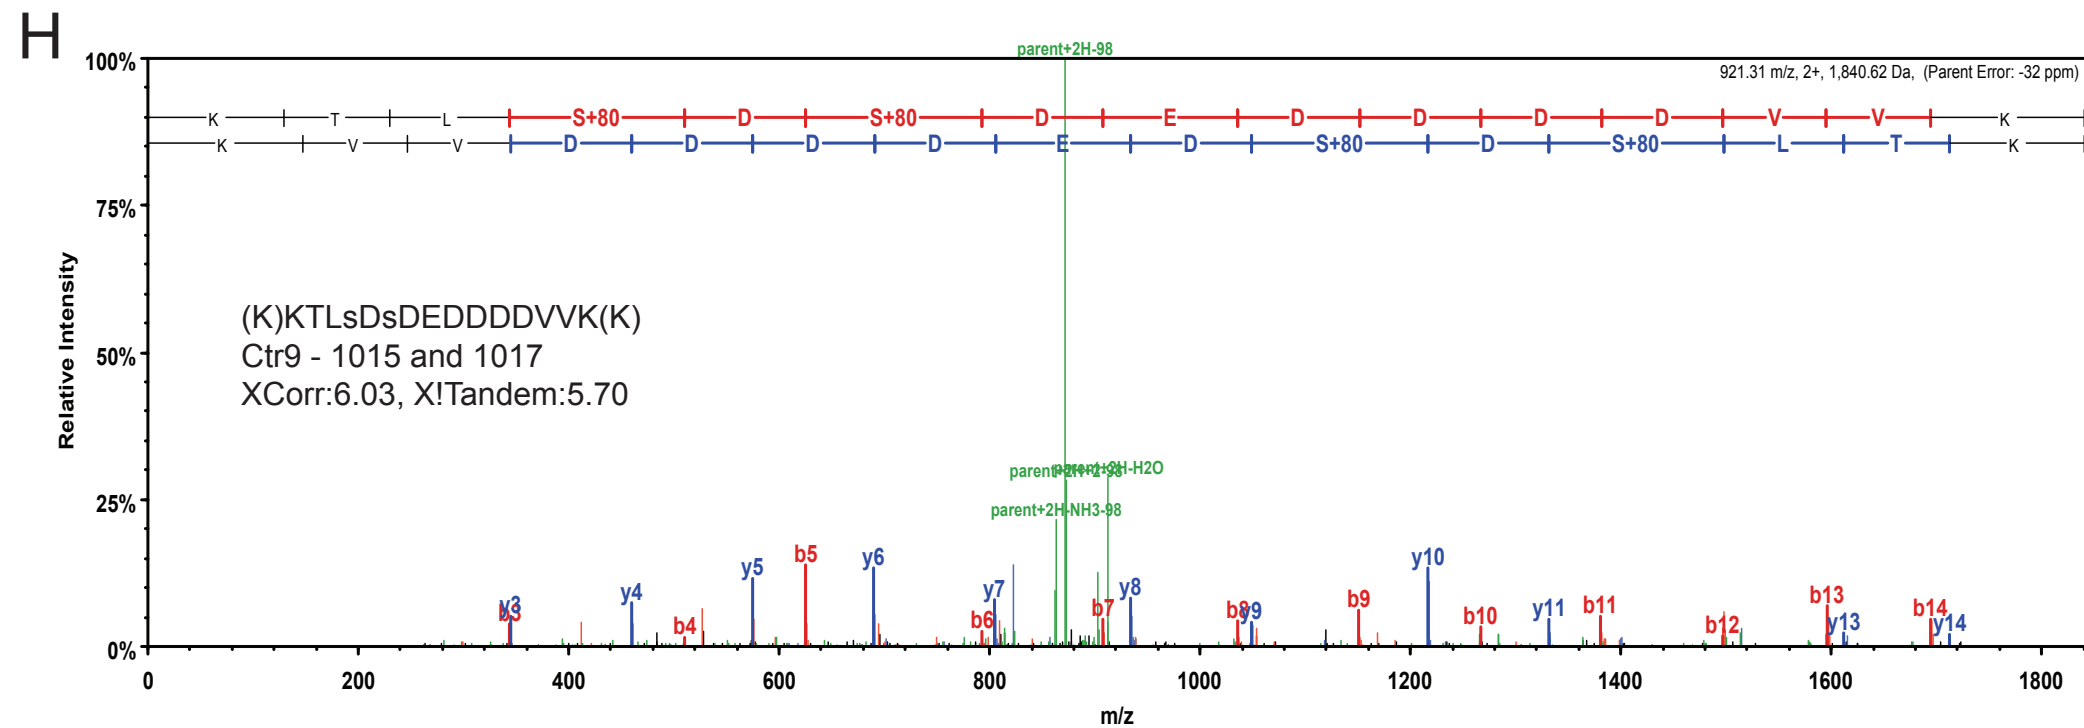

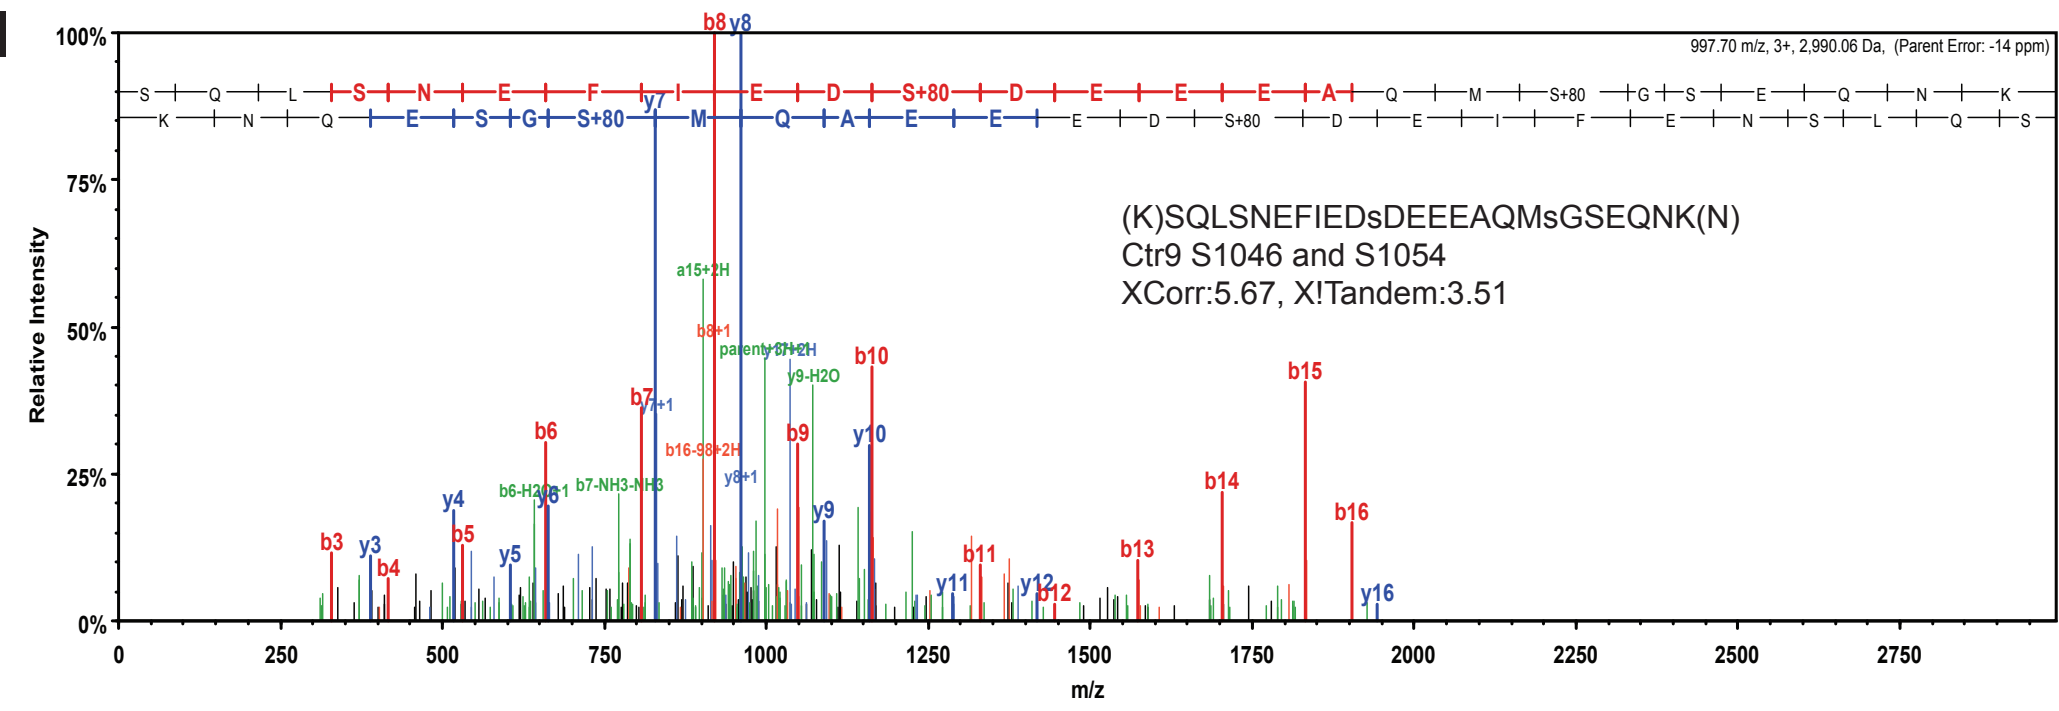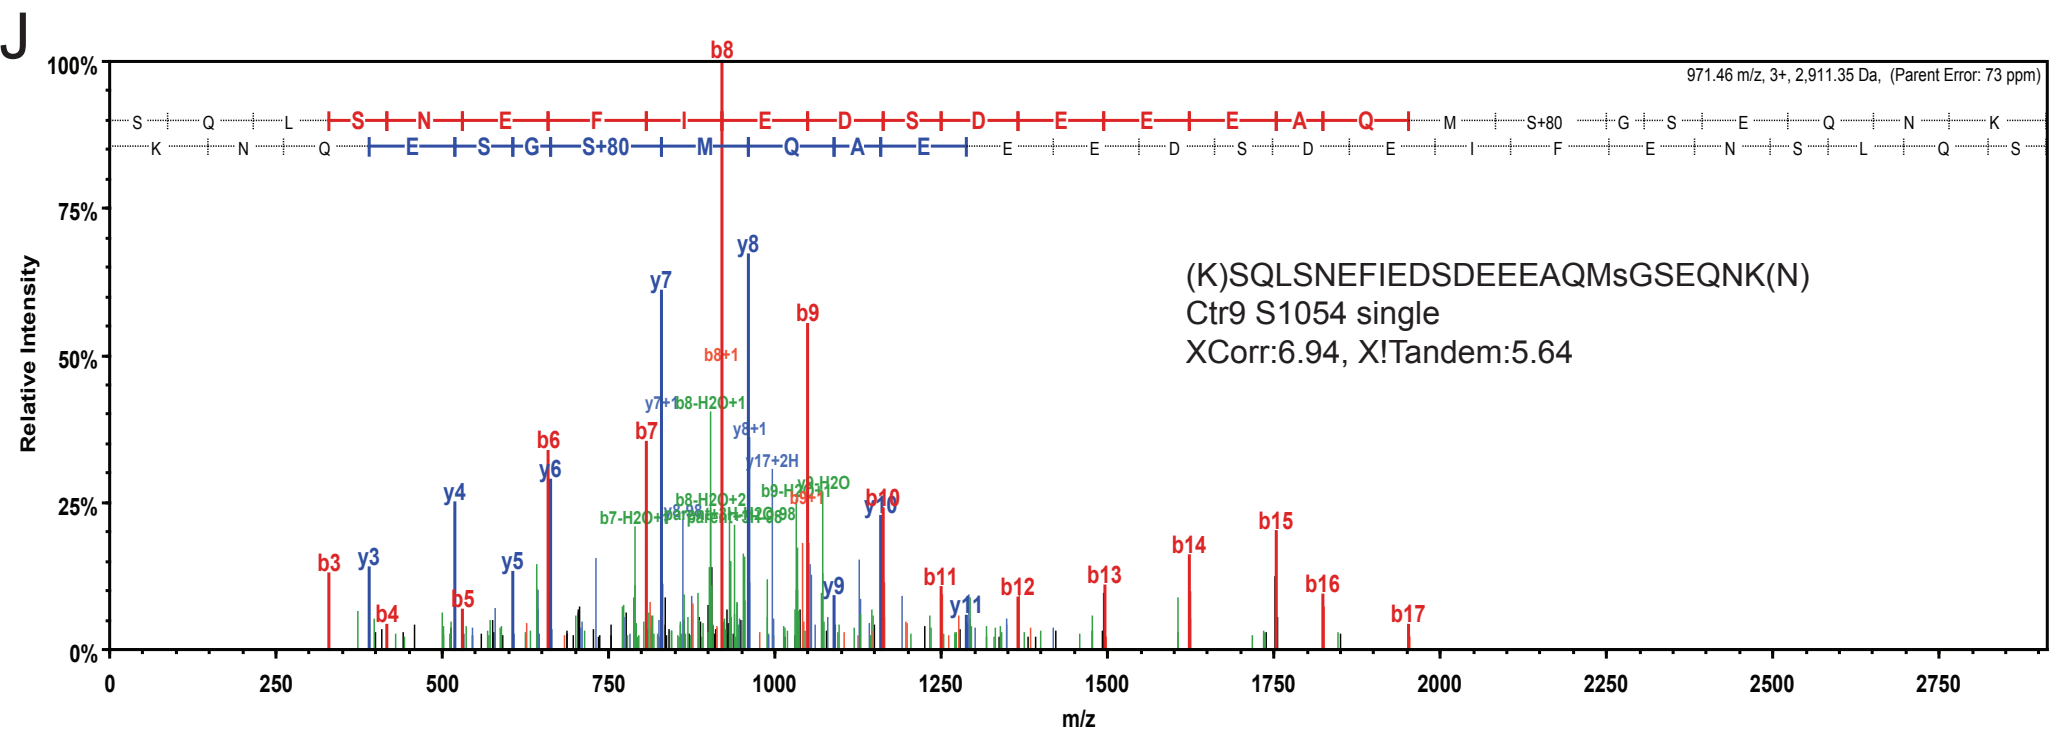

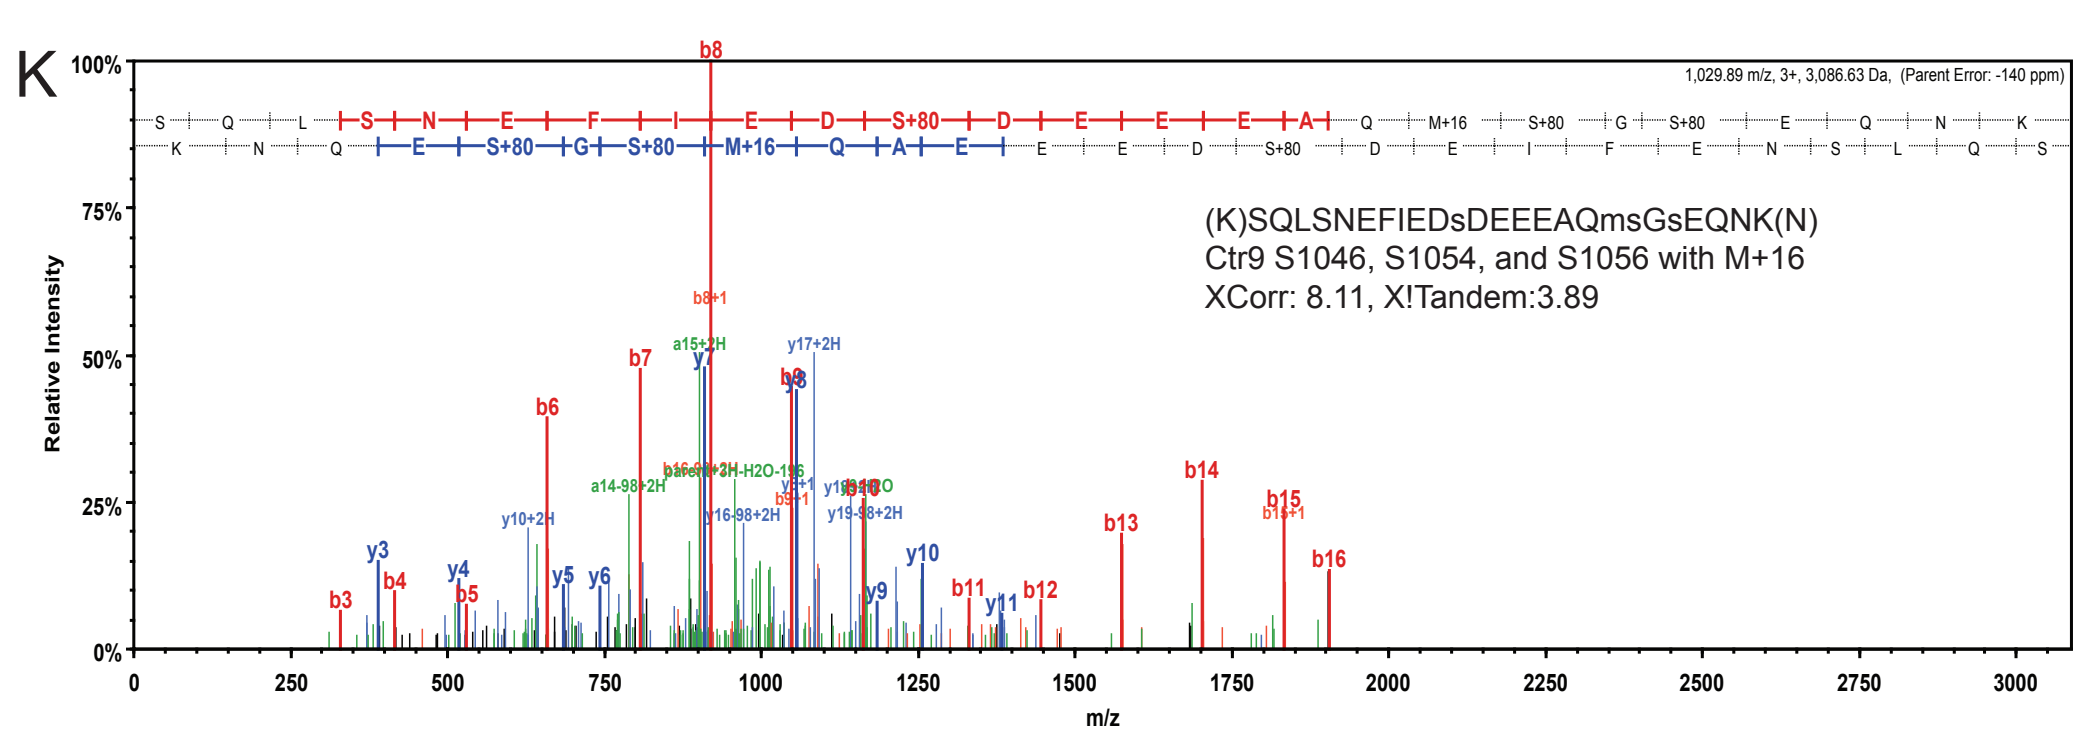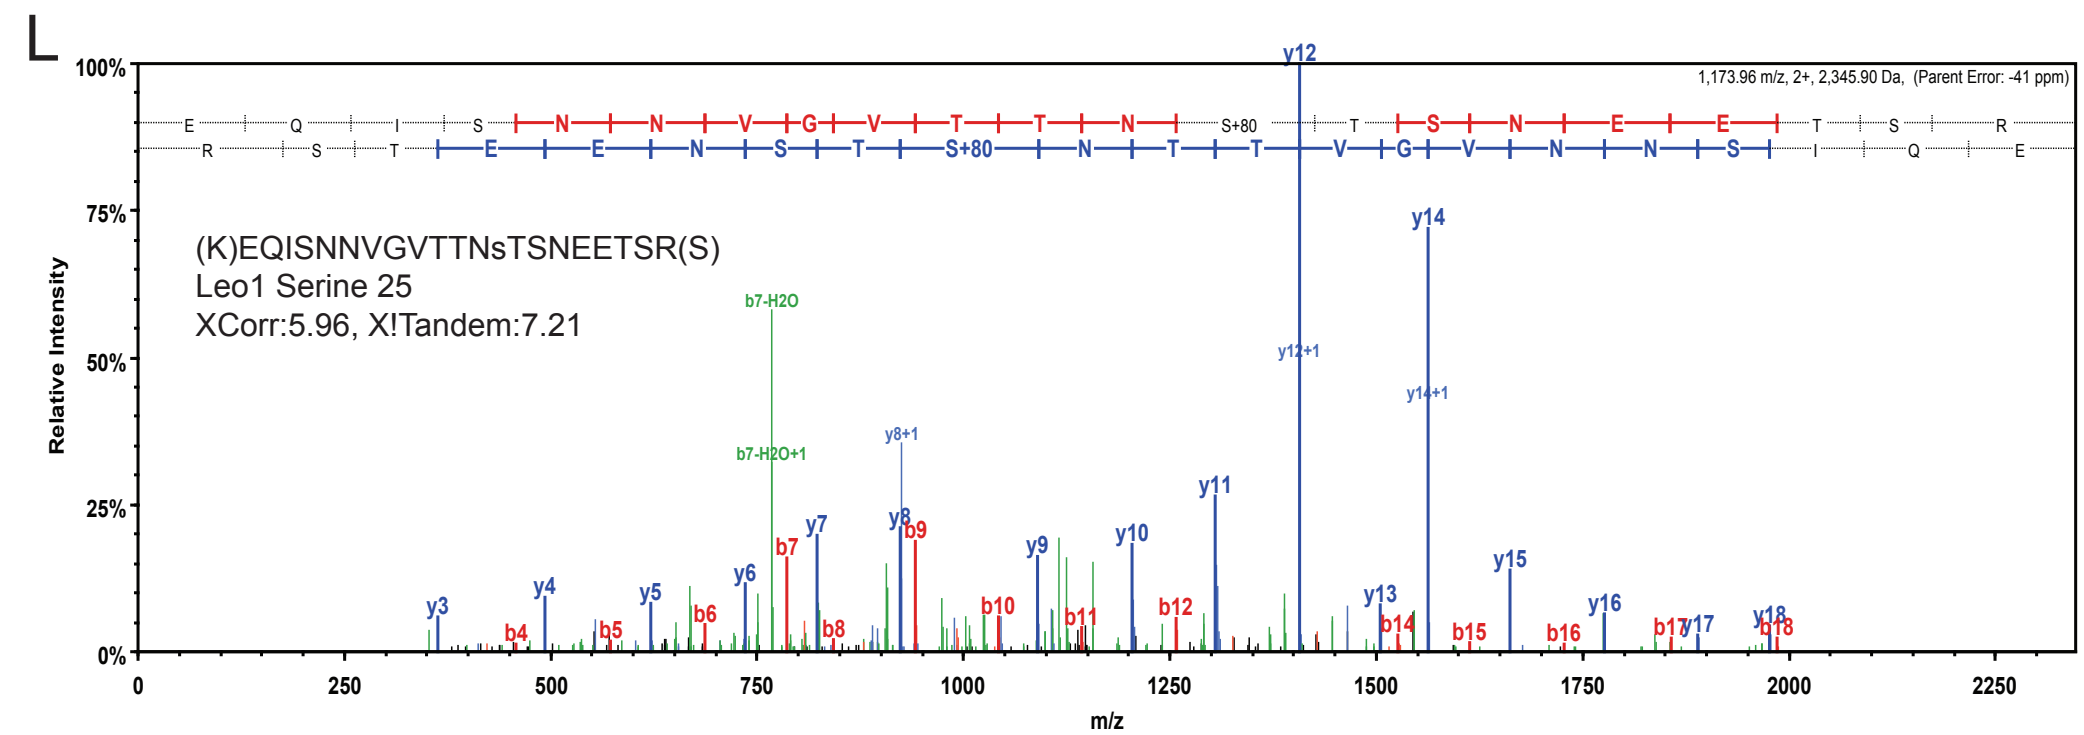



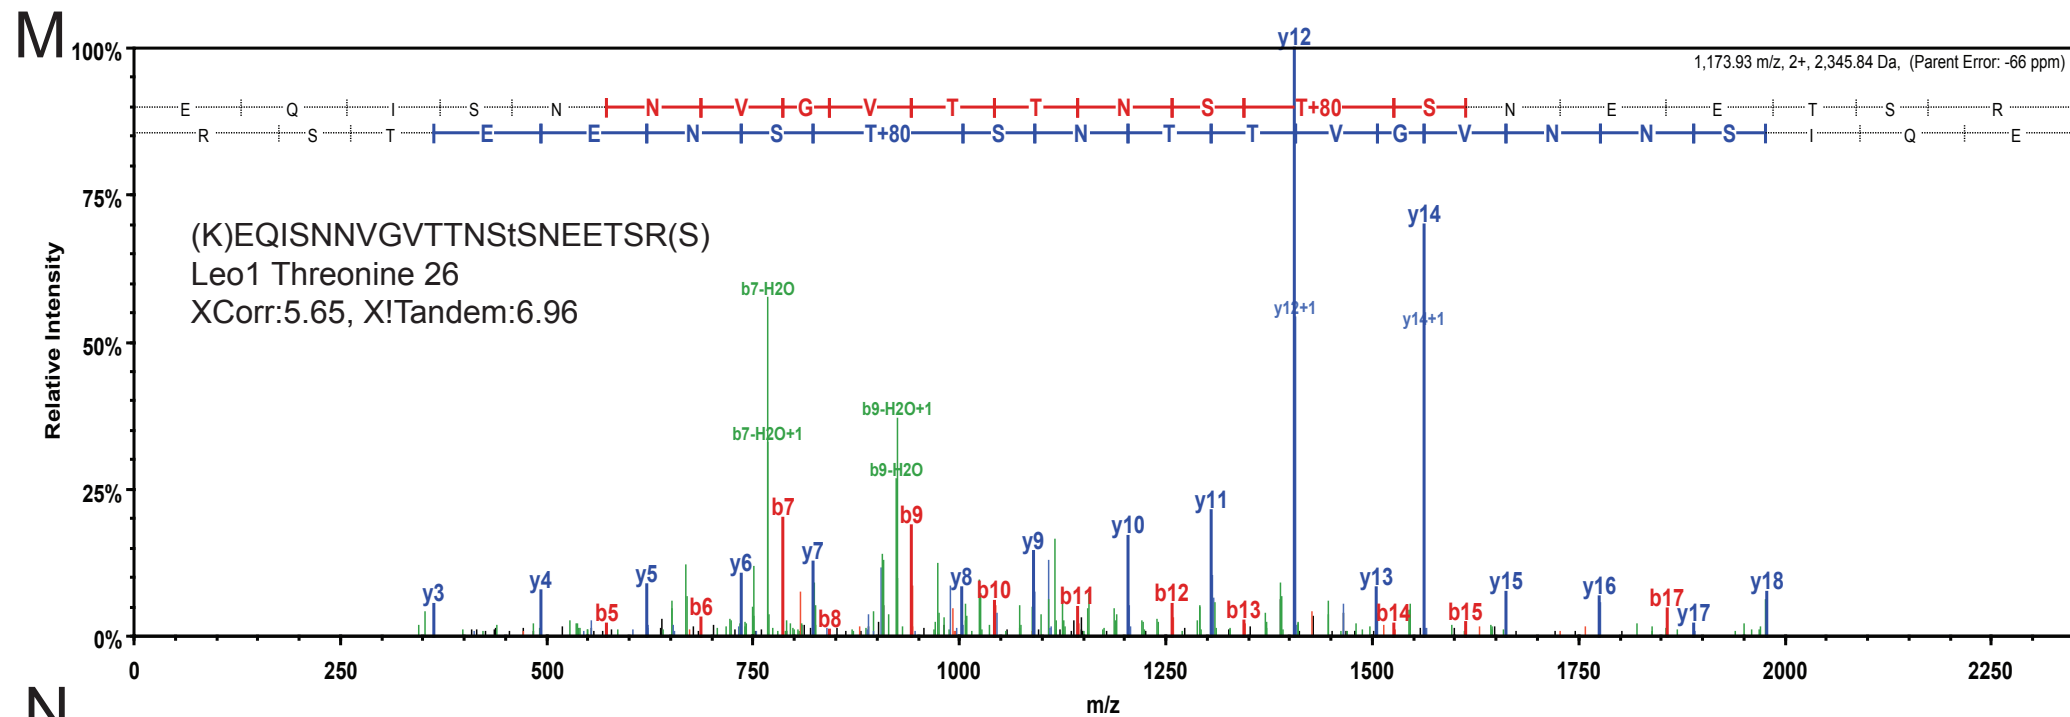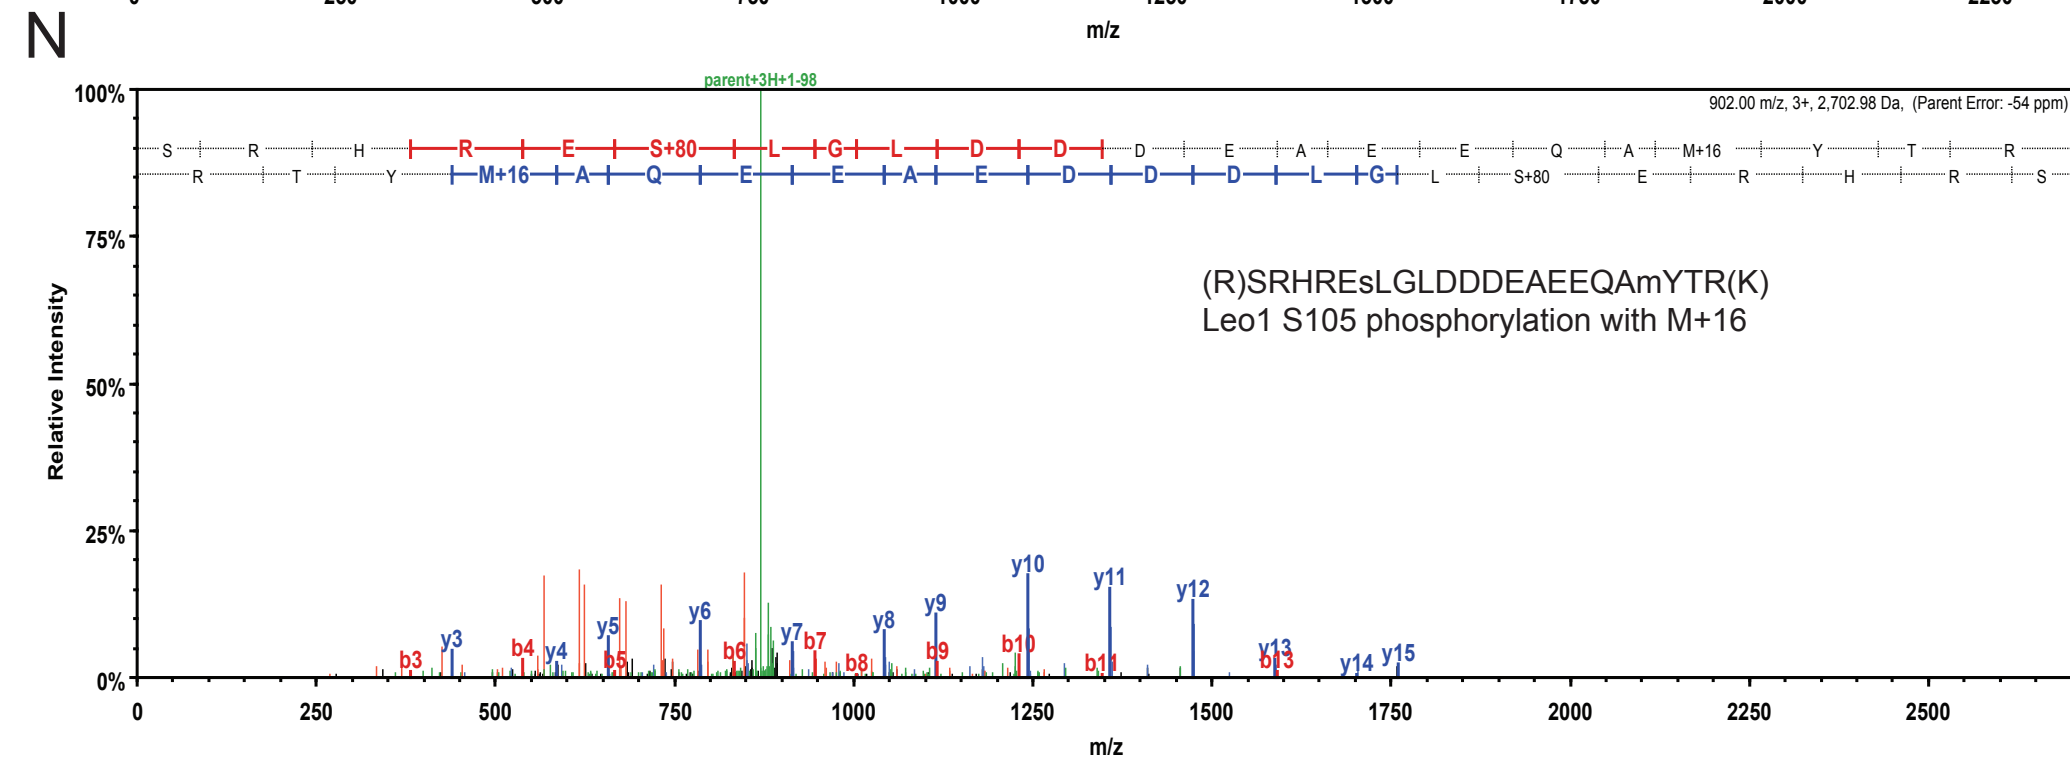

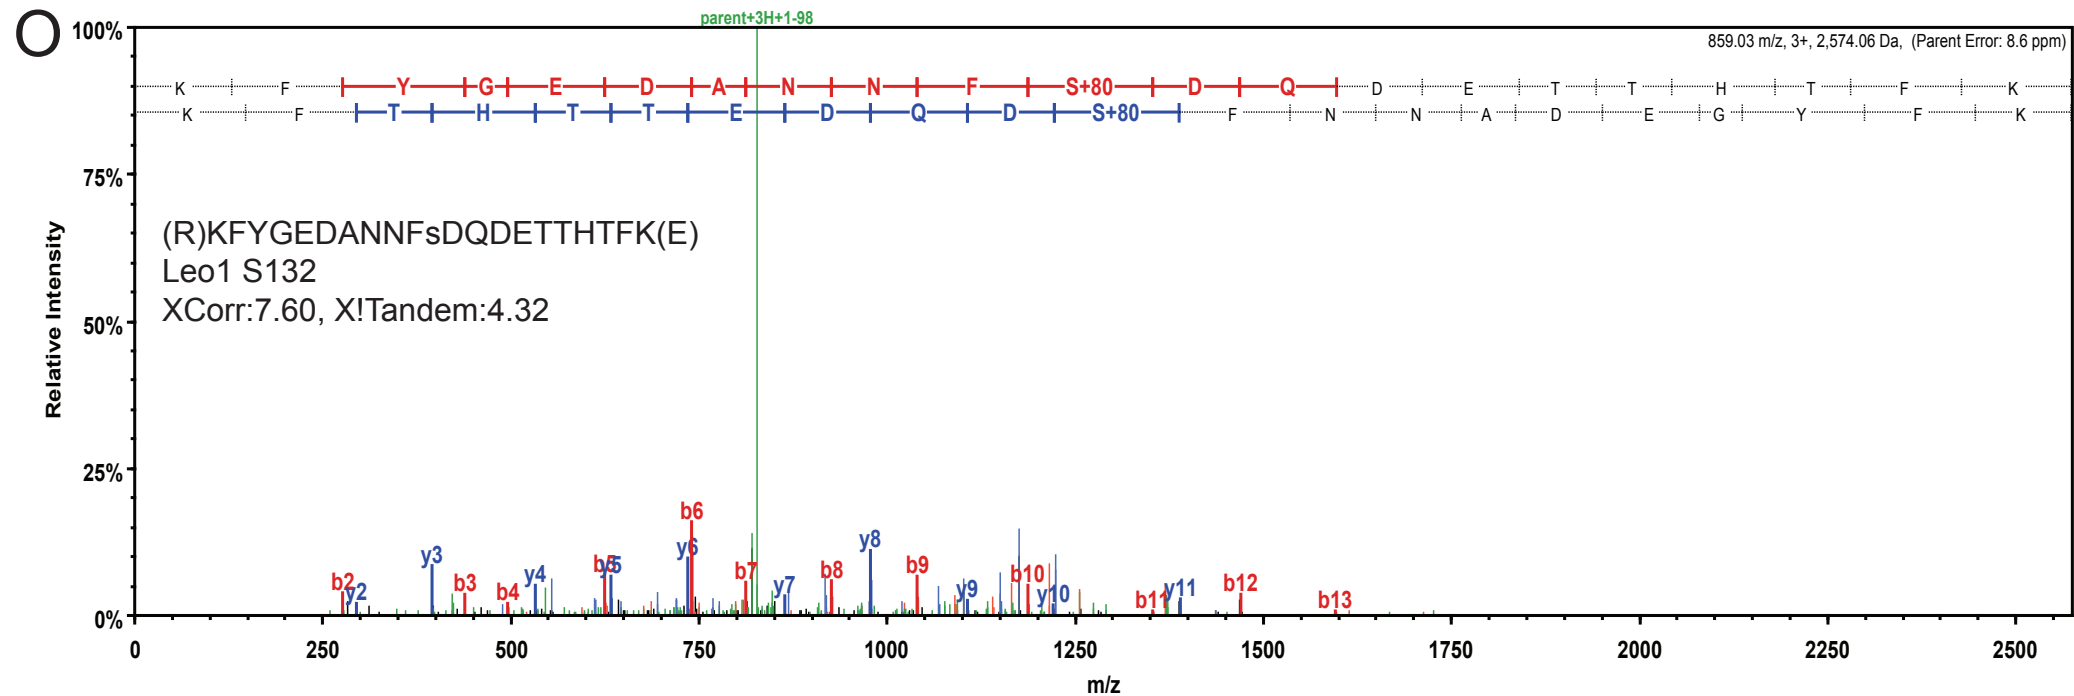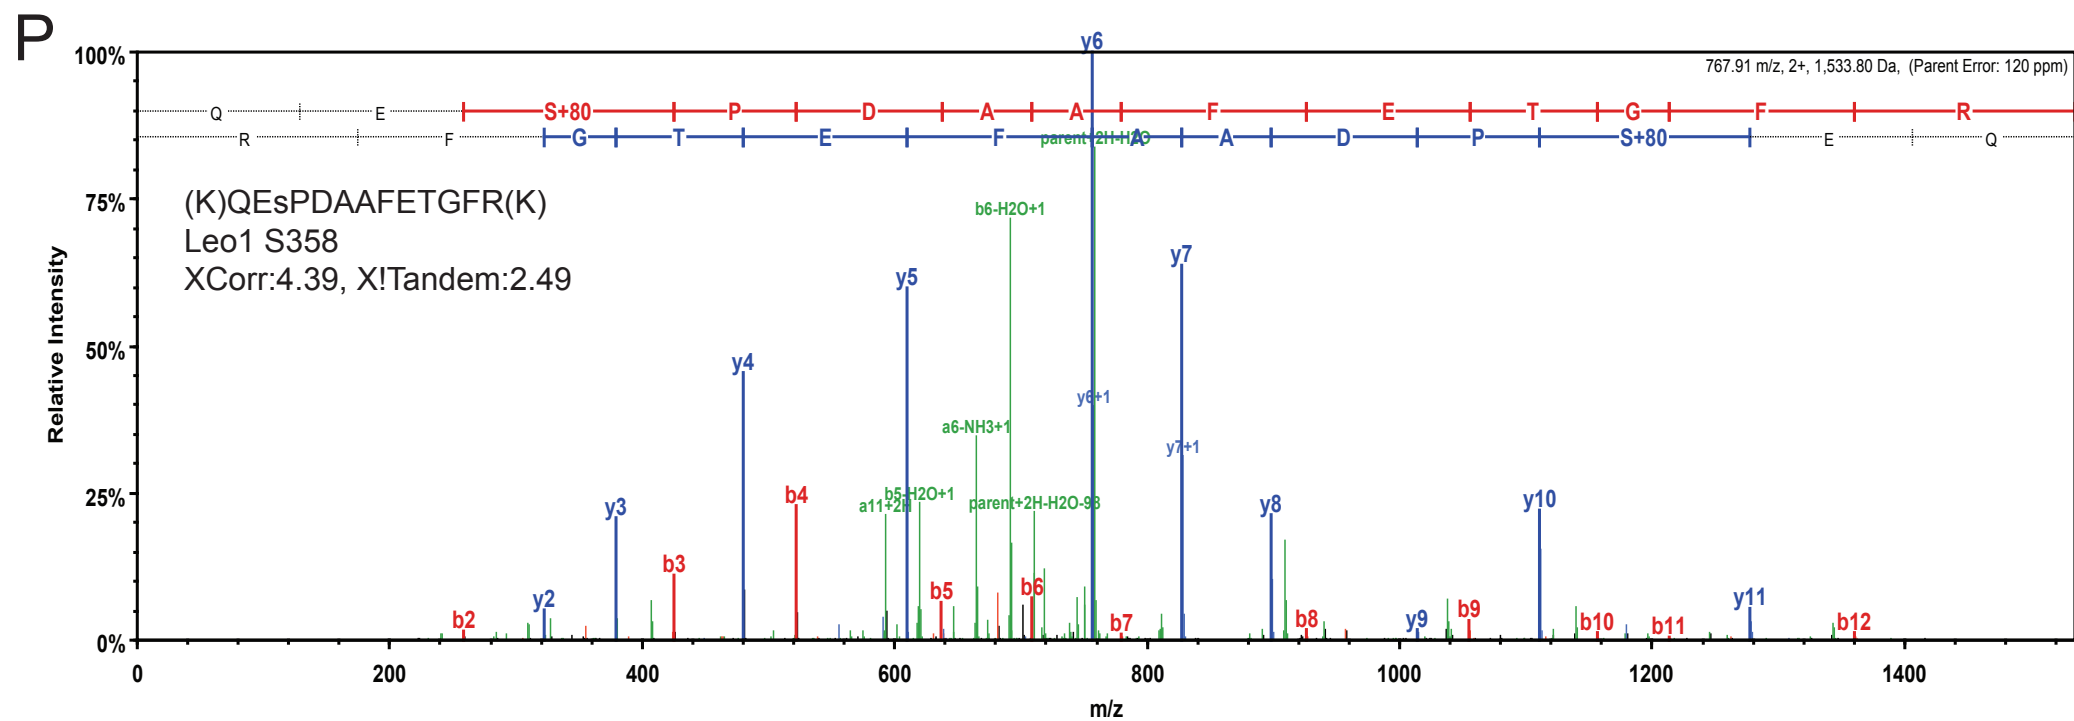

Q

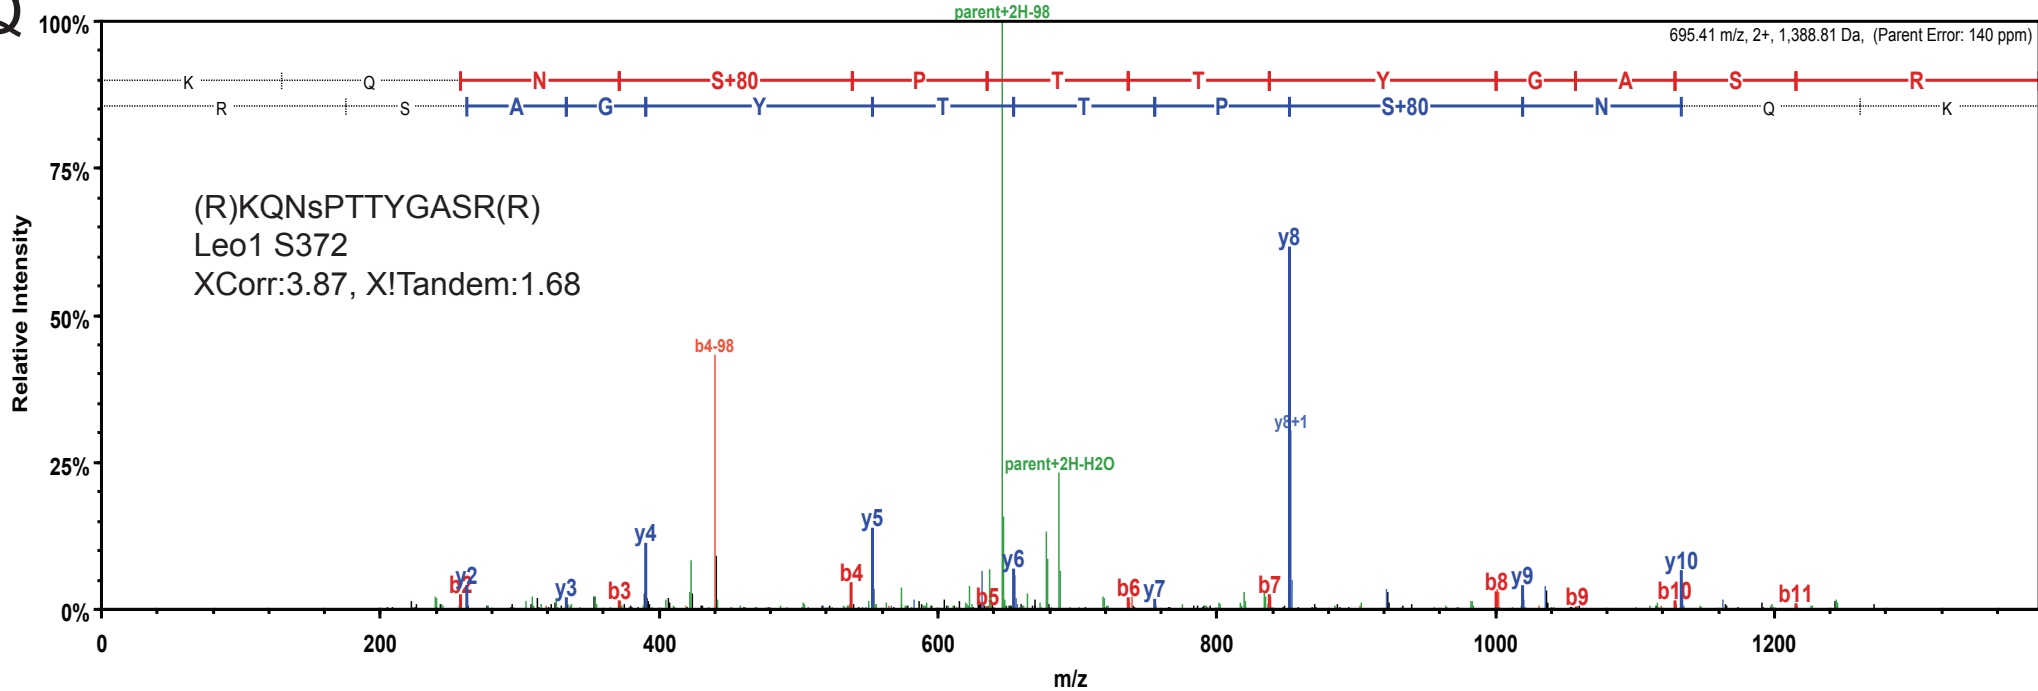

R

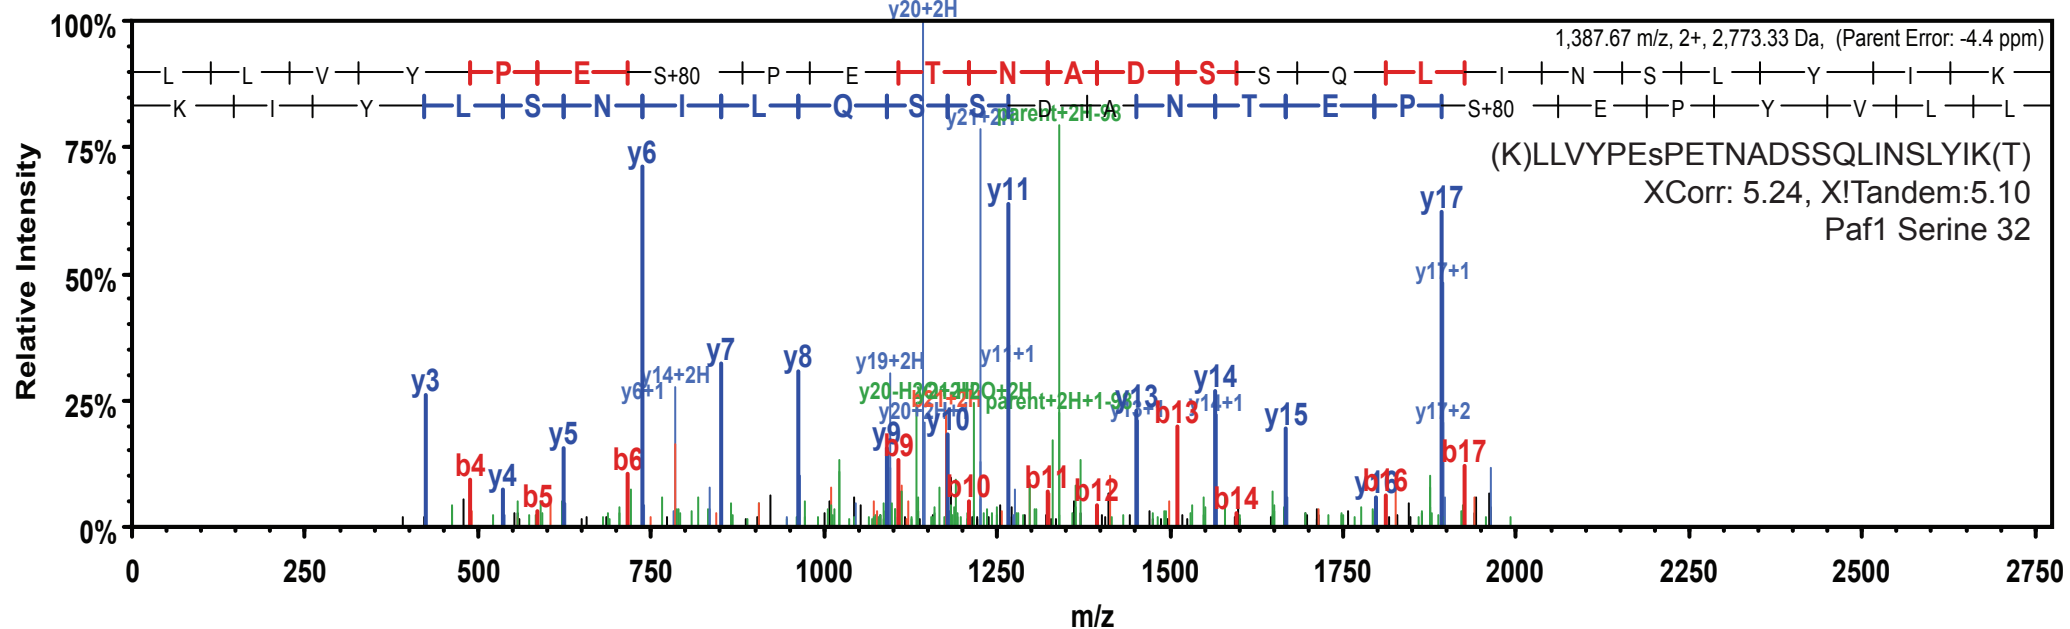

**S**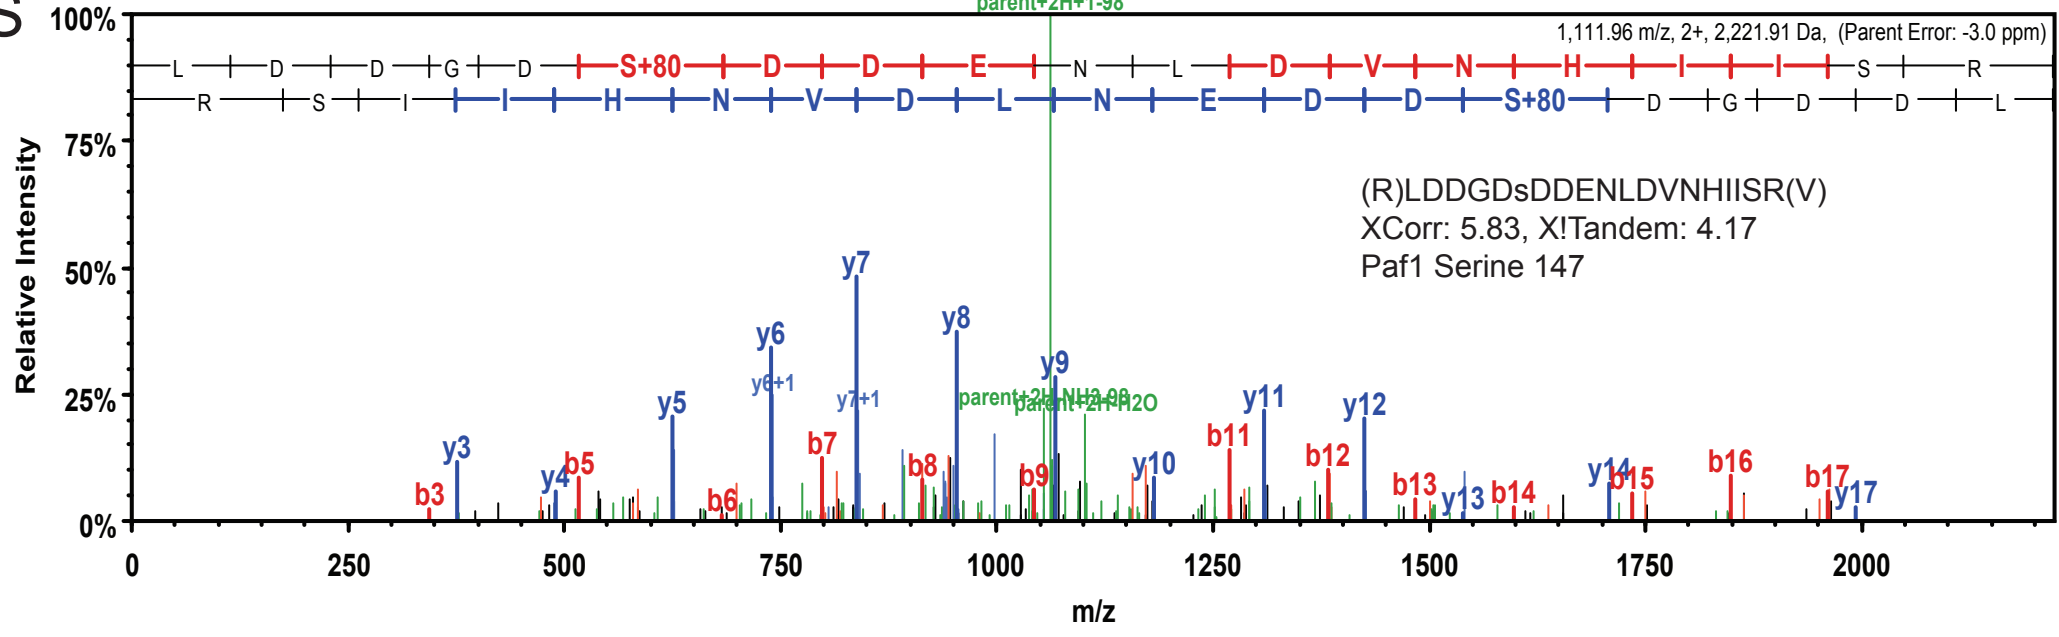**T**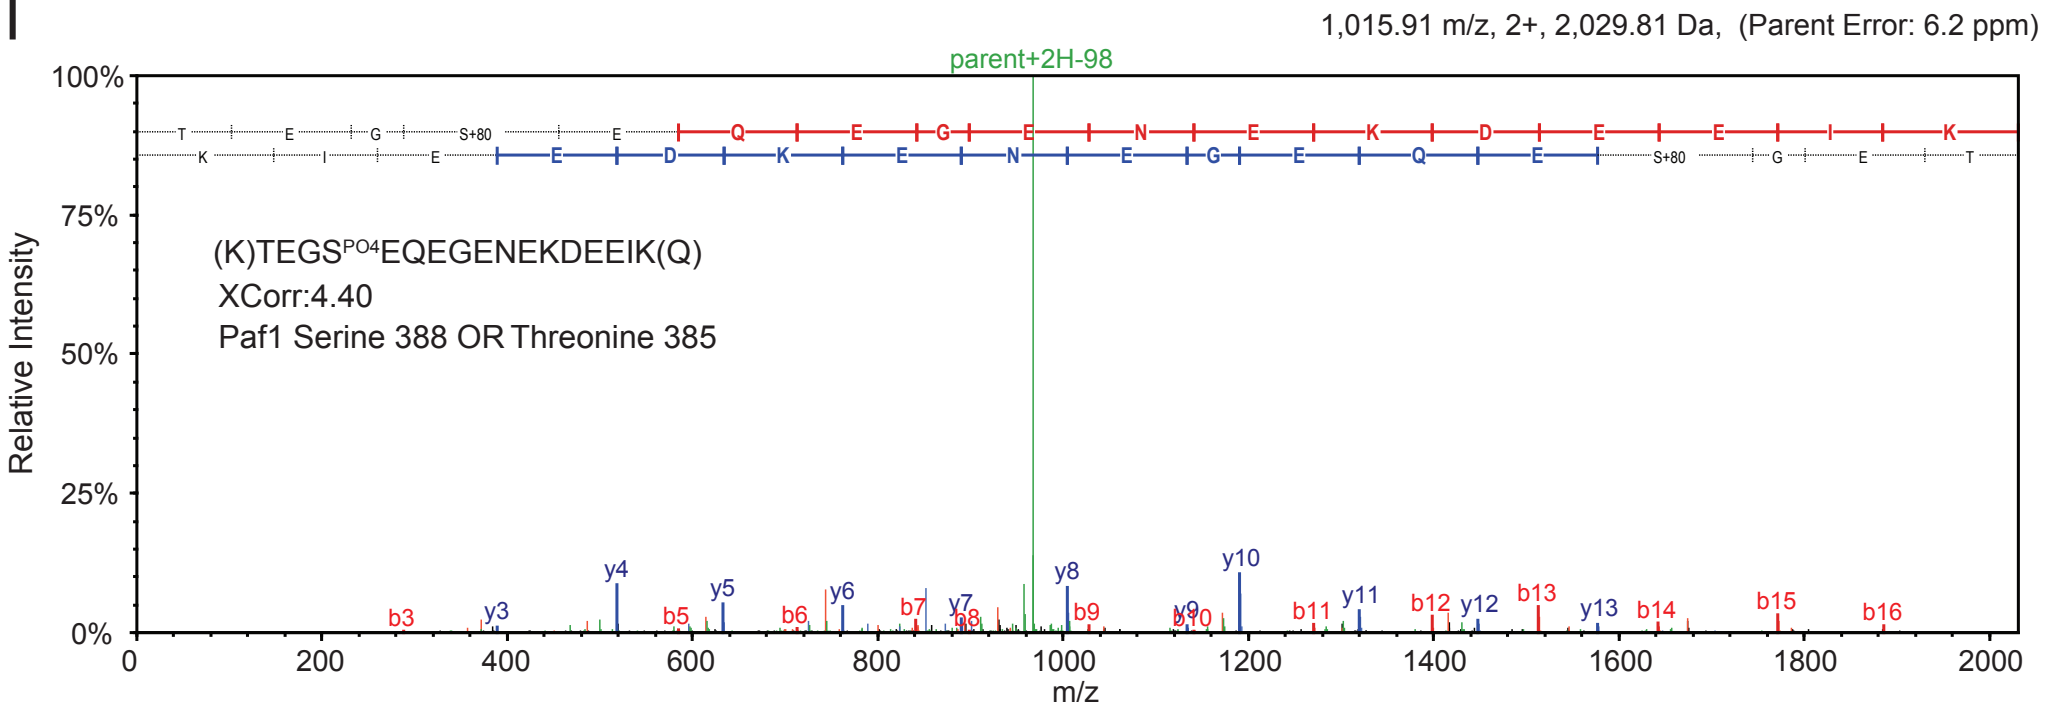

U

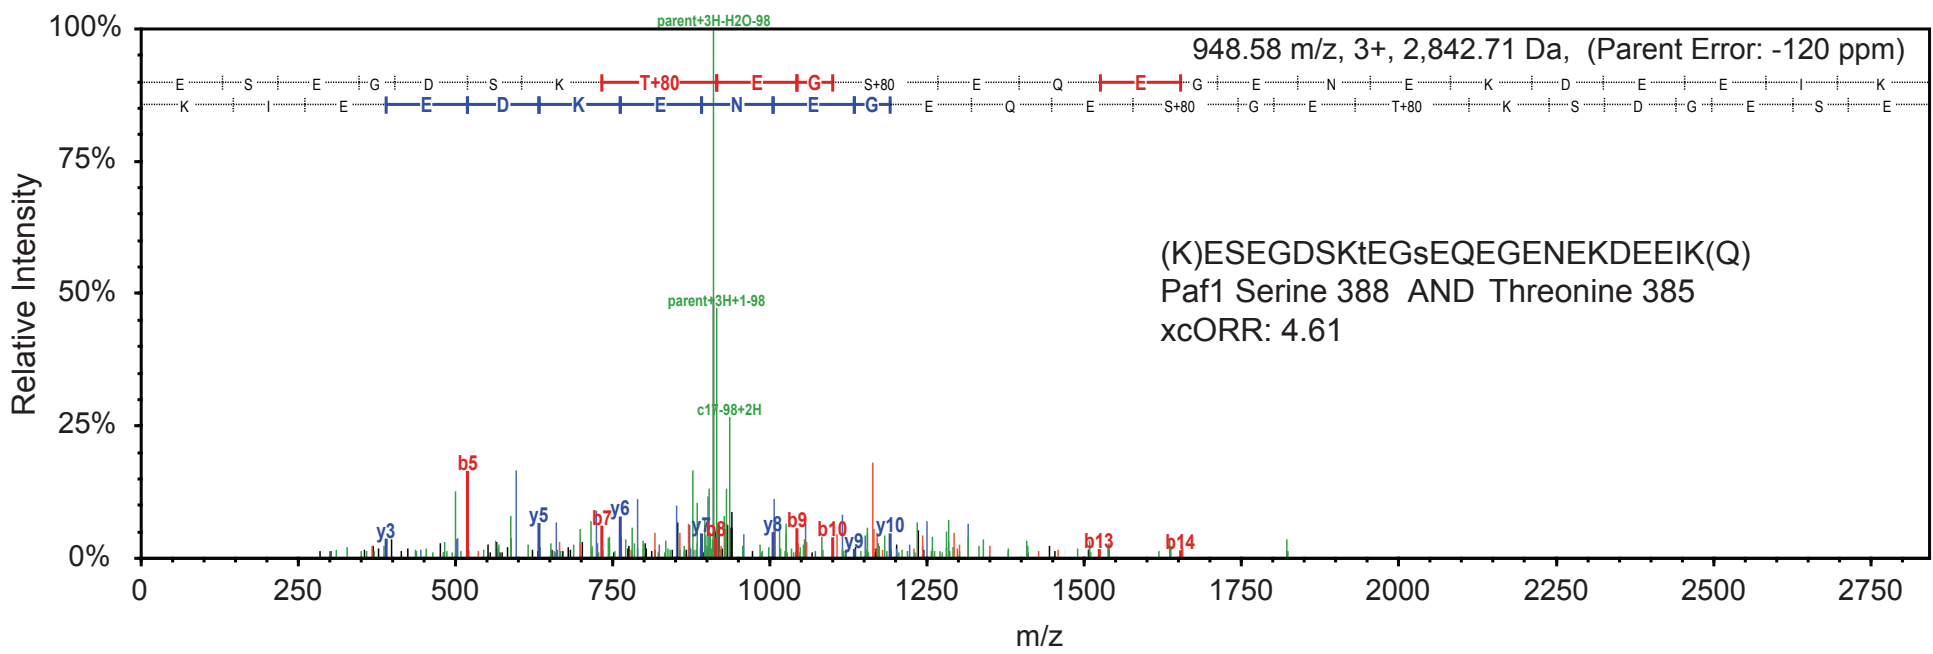

V

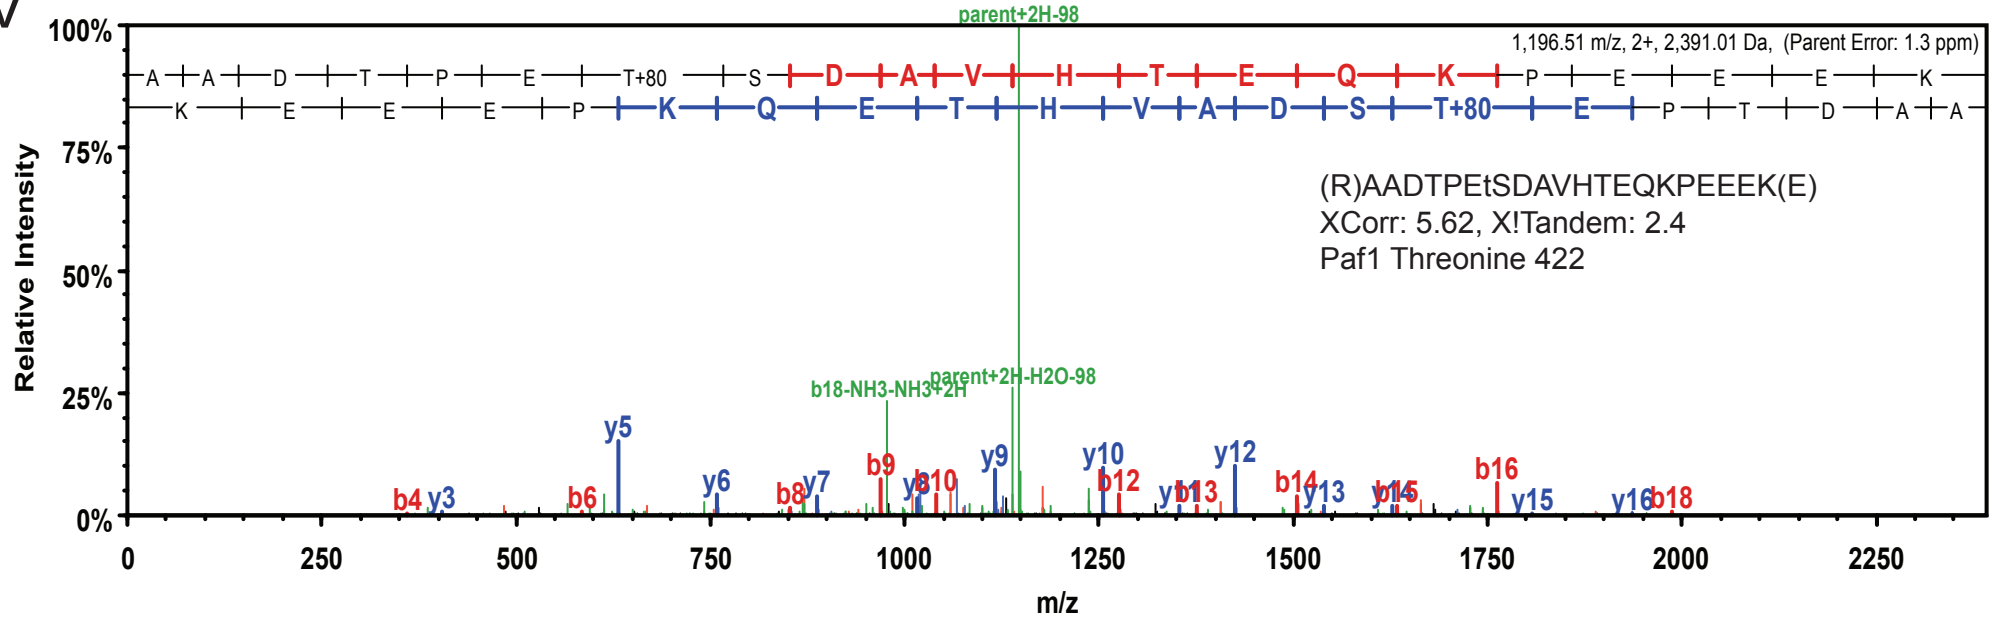

**W**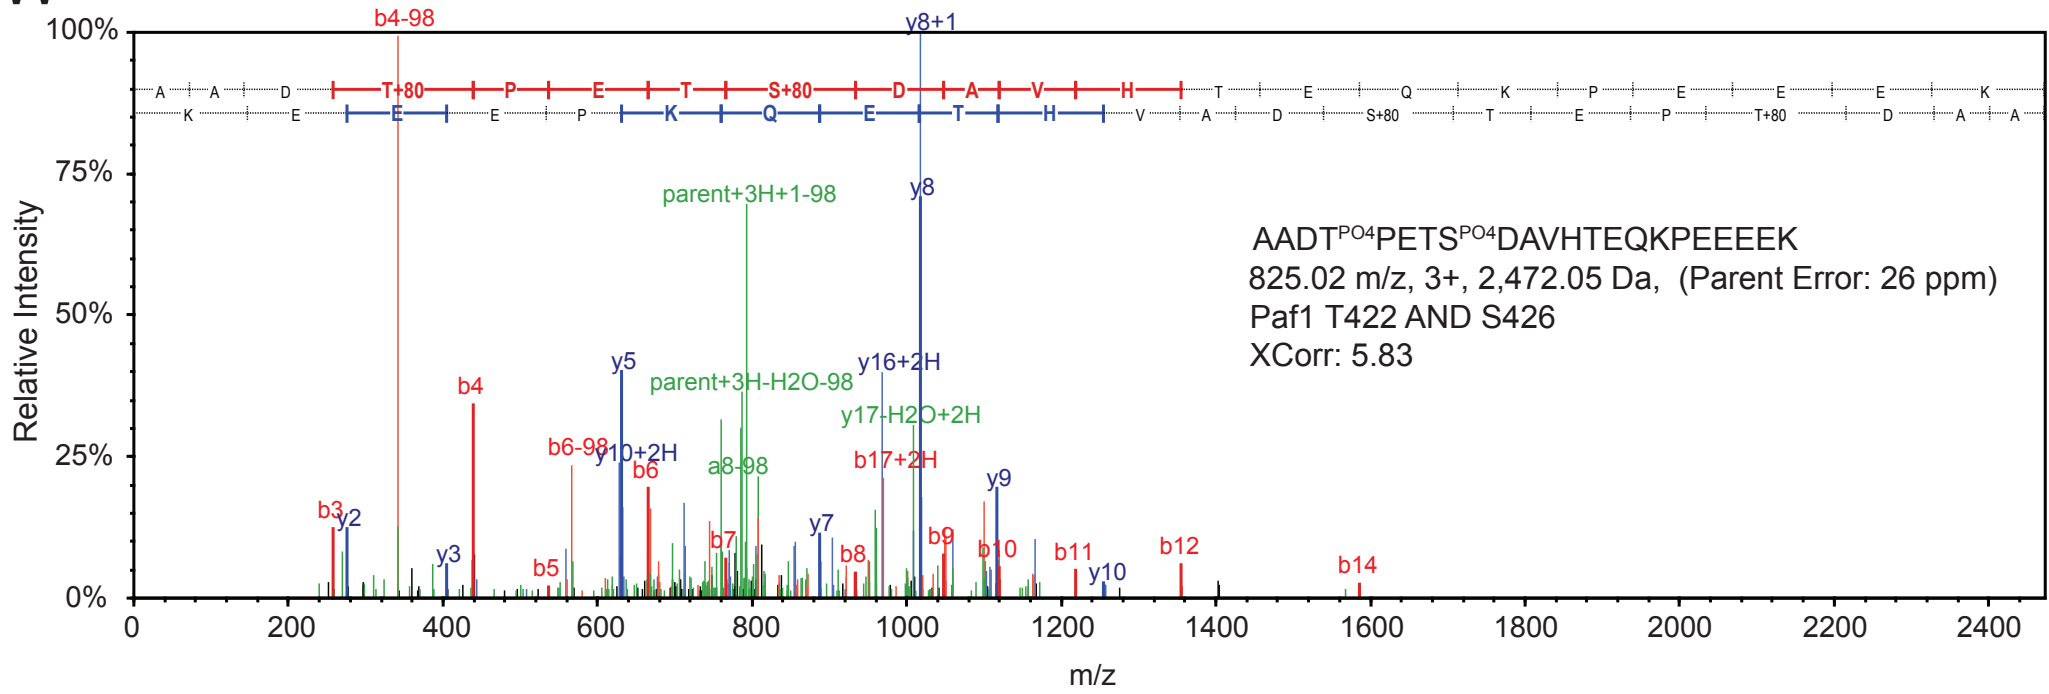**X**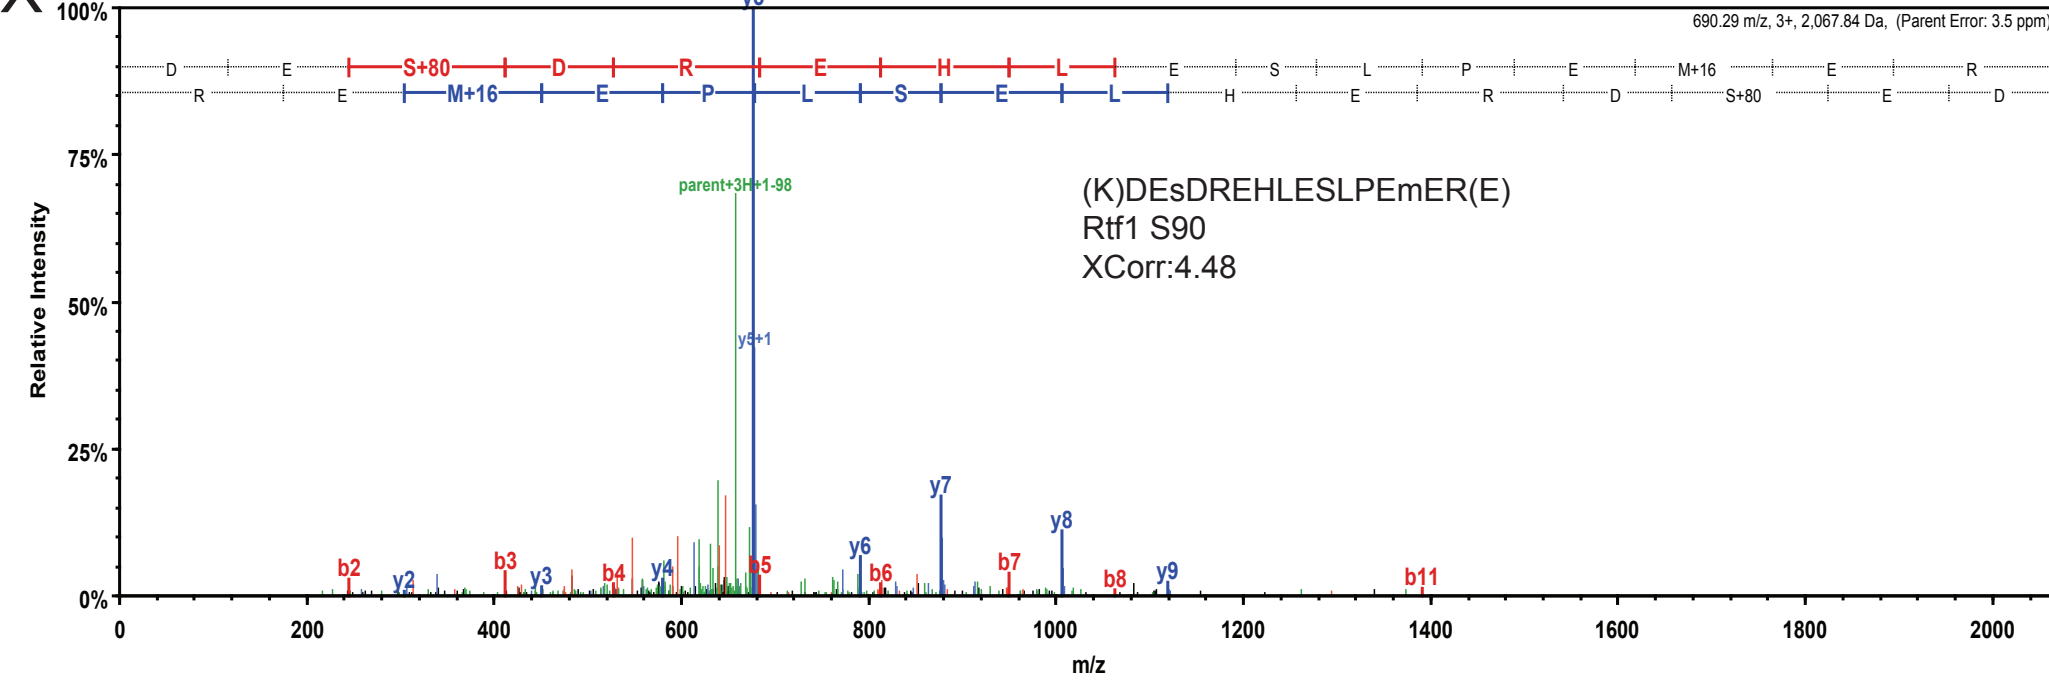

Y

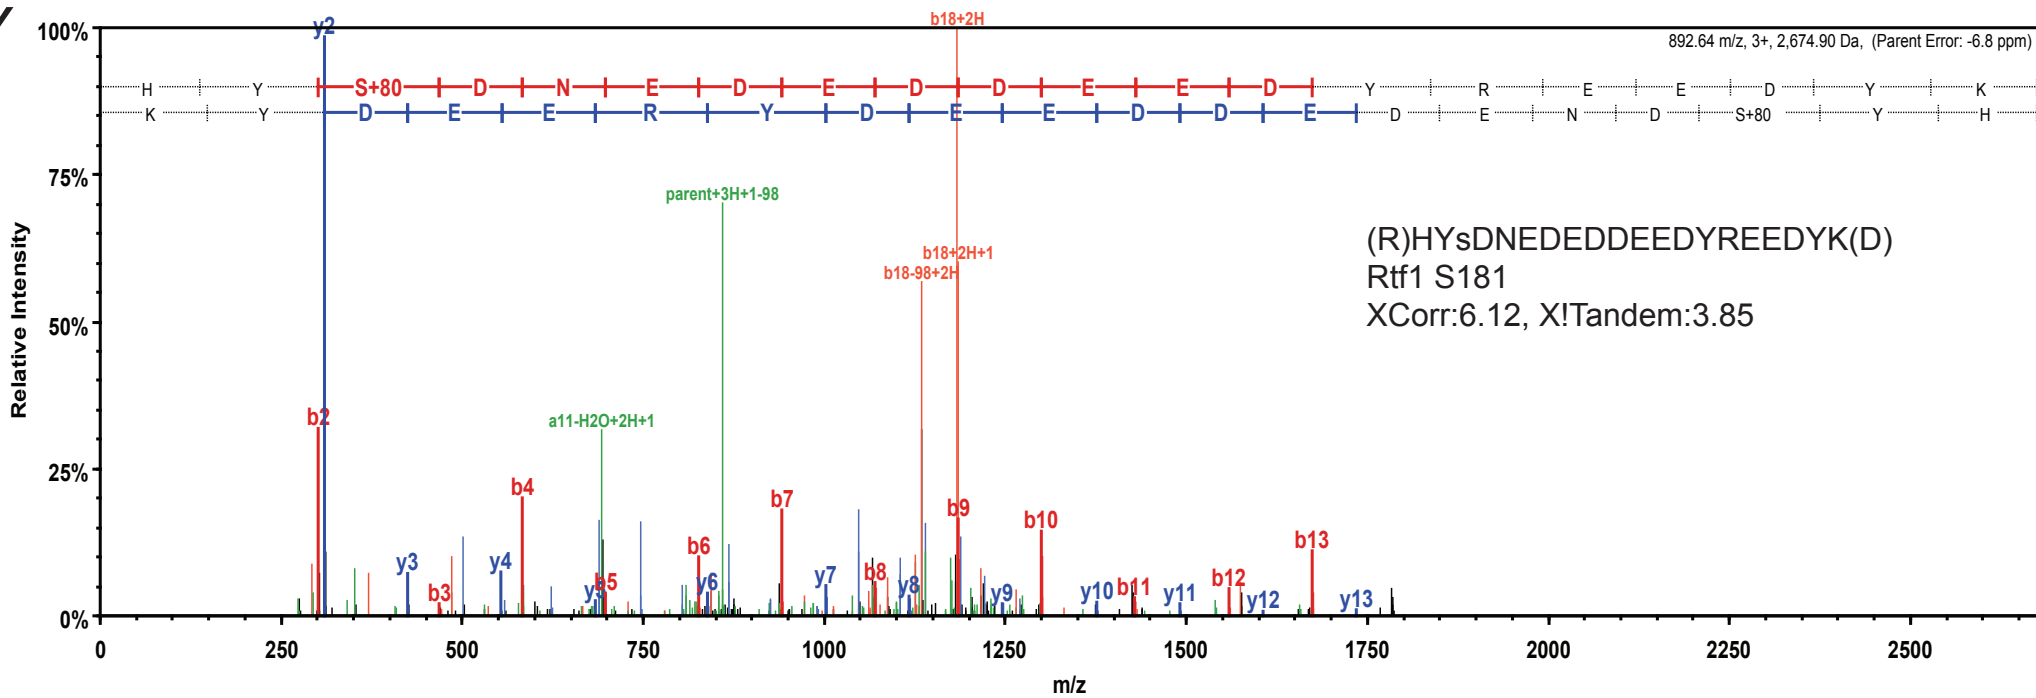

Z

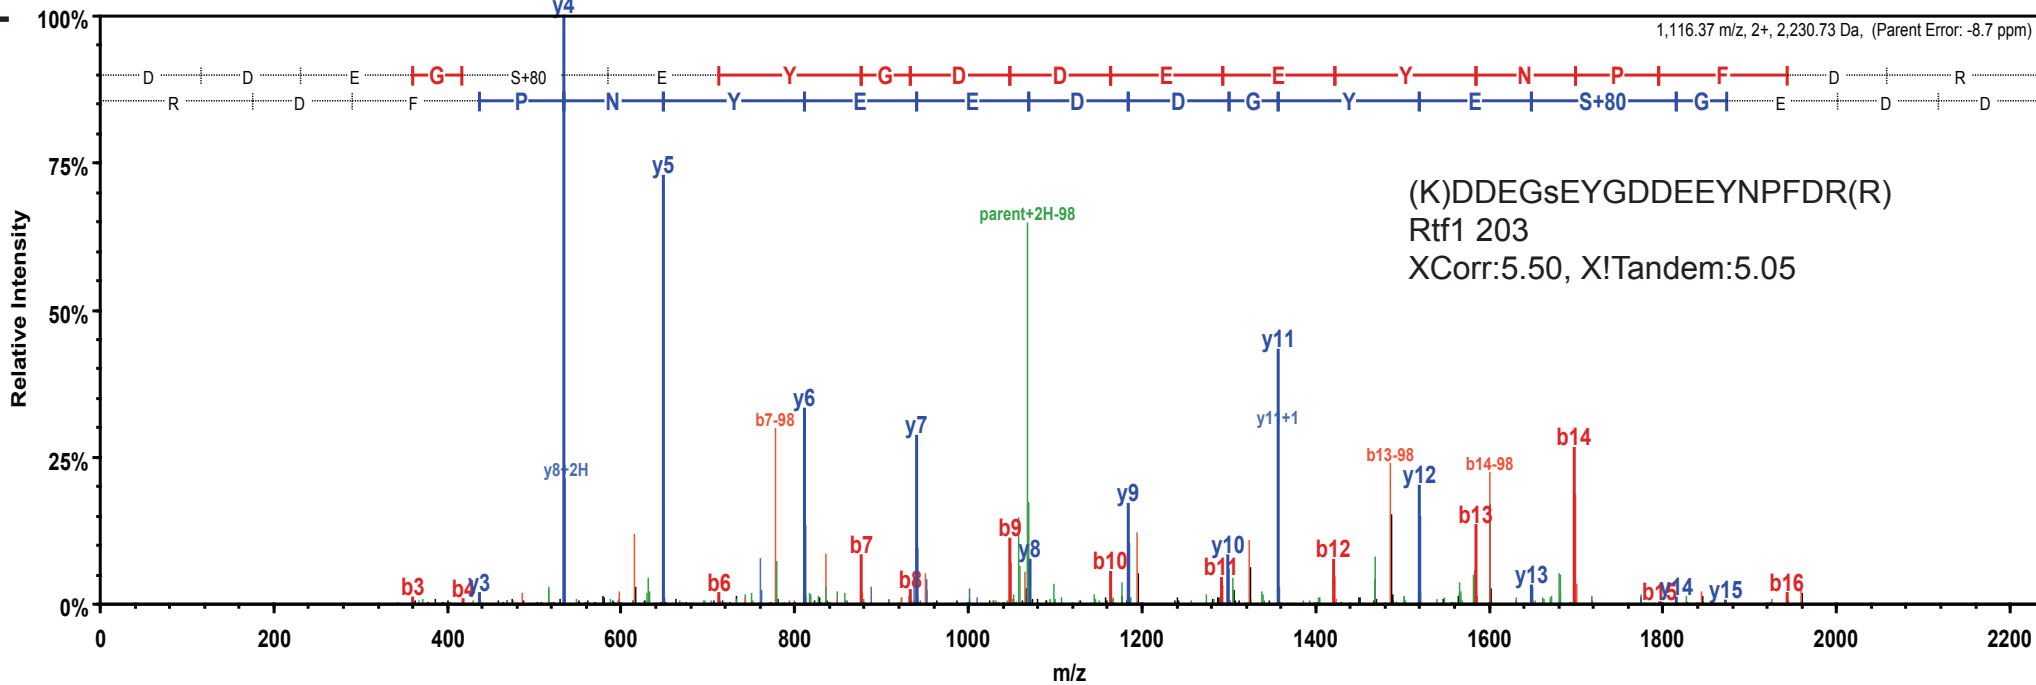

AA

Rtf1 S71 phosphorylation RIEVGSVEDDDEEDDYNPYSVGNADYGS<sub>PO4</sub>EEEEANPPFLEGGK peptide

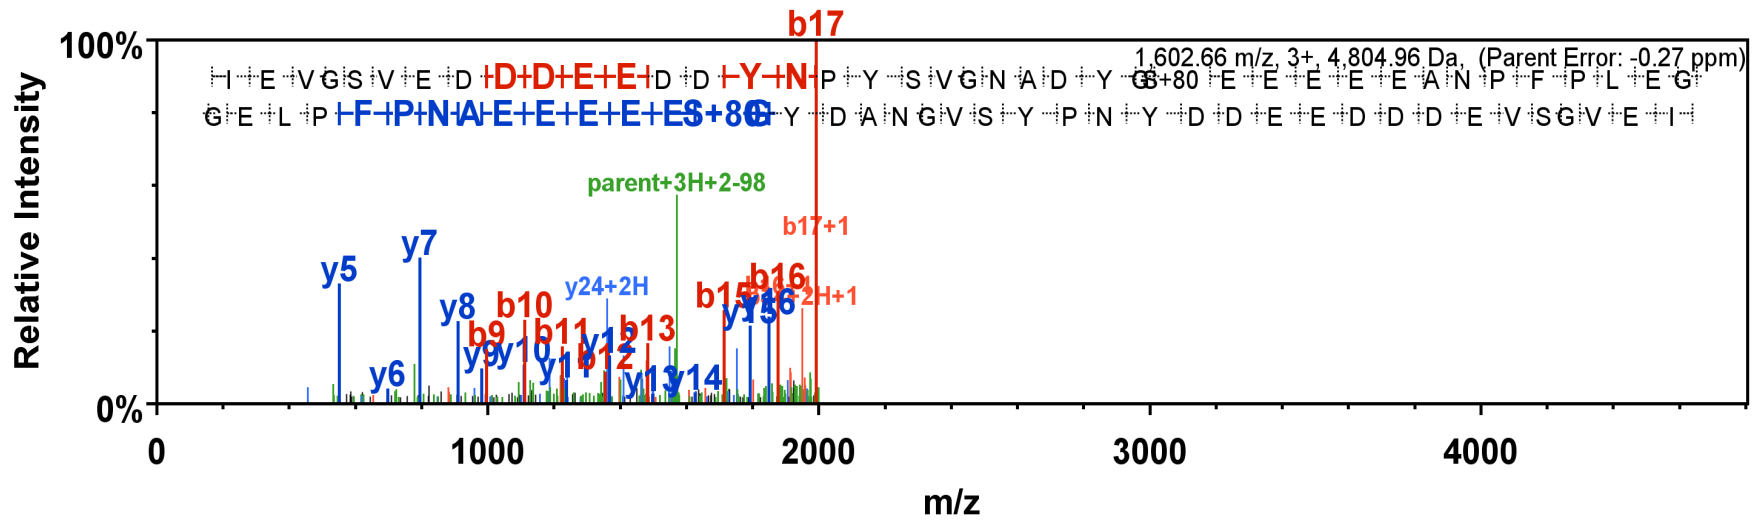

End of Figure S1
